# Supplementary material for: Photo-deactivation pathways of a double H-bonded photochromic Schiff base investigated by combined theoretical calculations and experimental time-resolved studies
Source: Royal Society of Chemistry journal article supplement (doi:10.1039/c1cp21039d), 2011-01-01
Supplement: c1cp21039d.pdf [file c1cp21039d.pdf]

## Supporting Information for

### **Photo-deactivation pathways of a double H-bonded photochromic Schiff base investigated by combined theoretical calculations and experimental time-resolved studies**

Carlos Randino<sup>[a]</sup>, Marcin Ziółek<sup>[b]</sup>, Ricard Gelabert<sup>[a]</sup>, Juan Angel Organero<sup>[b]</sup>, Michal Gil<sup>[b]</sup>,  
Miquel Moreno<sup>\*[a]</sup>, José M. Lluch<sup>[a]</sup> and Abderrazzak Douhal<sup>\*[b]</sup>

*Departament de Química, Universitat Autònoma de Barcelona, 08193 Bellaterra, Barcelona (Spain) and Departamento de Química Física, Facultad de Ciencias Ambientales y Bioquímicas, and INAMOL, Universidad de Castilla-La Mancha, Avda. Carlos III S.N. 45071 Toledo (Spain).*

<sup>[a]</sup> Universitat Autònoma de Barcelona.

<sup>[b]</sup> Universidad de Castilla-La Mancha

### **Index:**

- Geometries and energies of the structures.
- Stationary absorption spectrum of BSP in dichloromethane (Figure S1).
- Time constants and their fractional amplitudes for BSP in hexane and dichloromethane (Tables S1 and S2).
- Femtosecond emission transients of BSP in hexane and dichloromethane (Figures S2 and S3).
- Temporal changes in the absorbance spectrum of BSP in hexane (Figure S4).

## Geometries and Energies of the Structures

In what follows the geometries of the structures discussed in the paper are presented. Each geometry is presented framed in a table as a list of lines, each specifying the atomic number and the  $(x,y,z)$ -coordinates in Ångstrom. We note that the atom sequence is not the same in each structure, but the order in which the corresponding program selected to present the structure.

Each table has a heading identifying the chemical structure by the abbreviation given in the text, and the program under which it renders this energy (GAUSSIAN or TURBOMOLE). As usual, an asterisk denotes a structure in the excited state. At the bottom, the absolute energy obtained is reproduced to 8 decimal figures.

When a single structure is given and two energies are reported this means:

1. If it is a CI candidate, the reported TDDFT energies of ground and excited states at that point, which ideally should be equal.
2. Otherwise, the structure has been optimized in the ground state with the program indicated in the header of the Table, and a point calculation has been done for the excited state (that is, this is a Franck-Condon excitation).

Energies in the paper for the ground state use as energy origin the minimum in  $S_0$  obtained with Gaussian03. The energies appearing in the paper for the excited state structures are computed with Turbomole, using as energy origin the minimum in  $S_0$  obtained with Turbomole to have a coherent set of data.

### Stable Structures (Ground State):

| E<br>Optimized GAUSSIAN |                               |           |           | MK<br>Optimized GAUSSIAN |                               |           |           |
|-------------------------|-------------------------------|-----------|-----------|--------------------------|-------------------------------|-----------|-----------|
| 6                       | 7.035922                      | 0.864888  | -0.419105 | 6                        | -6.928077                     | 1.221692  | 0.109977  |
| 6                       | 5.637698                      | 0.745952  | -0.387905 | 6                        | -5.508018                     | 0.964739  | 0.107522  |
| 6                       | 5.045147                      | -0.348616 | 0.305044  | 6                        | -5.105934                     | -0.436031 | -0.083041 |
| 6                       | 5.883186                      | -1.283625 | 0.946158  | 6                        | -6.095148                     | -1.454086 | -0.247208 |
| 6                       | 7.262362                      | -1.158365 | 0.910169  | 6                        | -7.428639                     | -1.149265 | -0.235008 |
| 6                       | 7.831761                      | -0.075609 | 0.221039  | 6                        | -7.834443                     | 0.208243  | -0.053971 |
| 1                       | 7.466464                      | 1.705326  | -0.952873 | 1                        | -7.239770                     | 2.251788  | 0.248227  |
| 1                       | 5.422965                      | -2.115556 | 1.474161  | 1                        | -5.764396                     | -2.481826 | -0.388153 |
| 1                       | 7.894450                      | -1.886552 | 1.407173  | 1                        | -8.176843                     | -1.924532 | -0.360997 |
| 1                       | 8.912210                      | 0.031894  | 0.186448  | 1                        | -8.897231                     | 0.438275  | -0.046432 |
| 8                       | 4.898355                      | 1.671884  | -1.012558 | 8                        | -4.656995                     | 1.890450  | 0.261684  |
| 1                       | 3.941790                      | 1.424287  | -0.875704 | 6                        | -3.748311                     | -0.767292 | -0.098870 |
| 6                       | 3.607871                      | -0.510602 | 0.359938  | 7                        | -2.797753                     | 0.154129  | 0.054561  |
| 7                       | 2.796848                      | 0.326404  | -0.203313 | 1                        | -3.446130                     | -1.803583 | -0.232403 |
| 1                       | 3.233117                      | -1.377176 | 0.919579  | 6                        | -1.407417                     | -0.017071 | 0.046526  |
| 6                       | 1.406636                      | 0.126319  | -0.190679 | 6                        | -0.614386                     | 1.090164  | 0.388564  |
| 6                       | 0.582627                      | 1.263662  | -0.220638 | 6                        | 0.770283                      | 0.992718  | 0.400976  |
| 6                       | -0.800675                     | 1.143744  | -0.211057 | 6                        | 1.406824                      | -0.216151 | 0.067115  |
| 6                       | -1.406654                     | -0.126035 | -0.190636 | 6                        | 0.605510                      | -1.326291 | -0.248428 |
| 6                       | -0.582602                     | -1.263396 | -0.220811 | 6                        | -0.778870                     | -1.231057 | -0.275417 |
| 6                       | 0.800665                      | -1.143485 | -0.211268 | 1                        | -1.096621                     | 2.023802  | 0.662926  |
| 1                       | 1.050560                      | 2.242543  | -0.250233 | 1                        | 1.359664                      | 1.851275  | 0.706122  |
| 1                       | -1.415361                     | 2.036913  | -0.261184 | 1                        | 1.093054                      | -2.263846 | -0.495217 |
| 1                       | -1.050593                     | -2.242248 | -0.250546 | 1                        | -1.360952                     | -2.103063 | -0.552662 |
| 1                       | 1.415374                      | -2.036626 | -0.261574 | 7                        | 2.799180                      | -0.393629 | 0.068880  |
| 7                       | -2.796825                     | -0.326189 | -0.203238 | 6                        | 3.607433                      | 0.577444  | -0.215567 |
| 6                       | -3.607949                     | 0.510699  | 0.360074  | 6                        | 5.045274                      | 0.427479  | -0.159206 |
| 6                       | -5.045189                     | 0.348622  | 0.305025  | 6                        | 5.878671                      | 1.515999  | -0.489258 |
| 6                       | -5.883376                     | 1.283550  | 0.946081  | 6                        | 7.258648                      | 1.405722  | -0.444191 |
| 6                       | -7.262526                     | 1.158104  | 0.910068  | 6                        | 7.833771                      | 0.182573  | -0.063487 |
| 6                       | -7.831778                     | 0.075230  | 0.220991  | 6                        | 7.042945                      | -0.910112 | 0.265541  |
| 6                       | -7.035803                     | -0.865179 | -0.419102 | 6                        | 5.643799                      | -0.807389 | 0.223451  |
| 6                       | -5.637592                     | -0.746034 | -0.387915 | 1                        | 5.413895                      | 2.454687  | -0.781602 |
| 1                       | -5.423278                     | 2.115573  | 1.474046  | 1                        | 7.887274                      | 2.252128  | -0.699442 |
| 1                       | -7.894721                     | 1.886224  | 1.407037  | 1                        | 8.915061                      | 0.085517  | -0.025098 |
| 1                       | -8.912214                     | -0.032413 | 0.186405  | 1                        | 7.478300                      | -1.859014 | 0.559832  |
| 1                       | -7.466207                     | -1.705709 | -0.952837 | 1                        | 3.229311                      | 1.558911  | -0.528952 |
| 1                       | -3.233266                     | 1.377277  | 0.919754  | 8                        | 4.909139                      | -1.880588 | 0.544309  |
| 8                       | -4.898134                     | -1.671883 | -1.012559 | 1                        | 3.951583                      | -1.618843 | 0.451428  |
| 1                       | -3.941593                     | -1.424217 | -0.875688 | 1                        | -3.236825                     | 1.103748  | 0.190281  |
| E (S <sub>0</sub> )     | -1031.75257505 E <sub>h</sub> |           |           | E (S <sub>0</sub> )      | -1031.74456498 E <sub>h</sub> |           |           |

| DK<br>Optimized GAUSSIAN |                               |           |           | ER<br>Optimized GAUSSIAN |                               |           |           |
|--------------------------|-------------------------------|-----------|-----------|--------------------------|-------------------------------|-----------|-----------|
| 6                        | 6.952356                      | 1.153466  | -0.003544 | 6                        | 6.198565                      | 0.704171  | 1.054777  |
| 6                        | 5.527245                      | 0.928986  | -0.003703 | 6                        | 4.854131                      | 0.321923  | 0.926041  |
| 6                        | 5.094043                      | -0.475422 | 0.002231  | 6                        | 4.278003                      | 0.221977  | -0.372743 |
| 6                        | 6.060960                      | -1.527749 | 0.007285  | 6                        | 5.076076                      | 0.514988  | -1.497237 |
| 6                        | 7.400944                      | -1.252699 | 0.006885  | 6                        | 6.402385                      | 0.891310  | -1.360912 |
| 6                        | 7.836526                      | 0.107631  | 0.001421  | 6                        | 6.957005                      | 0.982778  | -0.074351 |
| 1                        | 7.286363                      | 2.185807  | -0.007616 | 1                        | 6.618031                      | 0.773352  | 2.052713  |
| 1                        | 5.707965                      | -2.557195 | 0.011481  | 1                        | 4.627830                      | 0.437633  | -2.485053 |
| 1                        | 8.132229                      | -2.053871 | 0.010624  | 1                        | 7.004751                      | 1.112390  | -2.235605 |
| 1                        | 8.904267                      | 0.313297  | 0.001277  | 1                        | 7.996091                      | 1.276836  | 0.043903  |
| 8                        | 4.695964                      | 1.885603  | -0.008074 | 8                        | 4.149131                      | 0.062684  | 2.035184  |
| 6                        | 3.729109                      | -0.774820 | 0.003213  | 1                        | 3.227140                      | -0.183766 | -1.746039 |
| 7                        | 2.801551                      | 0.182837  | -0.001376 | 6                        | 2.897067                      | -0.173643 | -0.551372 |
| 1                        | 3.403318                      | -1.812598 | 0.008046  | 7                        | 2.120904                      | -0.444630 | 0.448326  |
| 6                        | 1.408416                      | 0.051508  | -0.001456 | 1                        | 2.529964                      | -0.220705 | -1.584677 |
| 6                        | 0.644402                      | 1.230219  | -0.001546 | 6                        | 0.801975                      | -0.886841 | 0.252991  |
| 6                        | -0.742210                     | 1.184247  | -0.001635 | 6                        | -0.155258                     | -0.548672 | 1.224768  |
| 6                        | -1.408424                     | -0.051505 | -0.001418 | 6                        | -1.479476                     | -0.941932 | 1.092770  |
| 6                        | -0.644409                     | -1.230215 | -0.001746 | 6                        | -1.887058                     | -1.723700 | -0.008017 |
| 6                        | 0.742204                      | -1.184244 | -0.001868 | 6                        | -0.913982                     | -2.118937 | -0.946673 |
| 1                        | 1.151226                      | 2.190494  | -0.001585 | 6                        | 0.404074                      | -1.690246 | -0.830013 |
| 1                        | -1.294772                     | 2.117020  | -0.002274 | 1                        | 0.158578                      | 0.045854  | 2.076905  |
| 1                        | -1.151234                     | -2.190490 | -0.001943 | 1                        | -2.208595                     | -0.665387 | 1.846902  |
| 1                        | 1.294764                      | -2.117016 | -0.002687 | 1                        | -1.211455                     | -2.775188 | -1.758350 |
| 7                        | -2.801557                     | -0.182833 | -0.001319 | 1                        | 1.139631                      | -2.024031 | -1.555182 |
| 6                        | -3.729111                     | 0.774827  | 0.003360  | 7                        | -3.184274                     | -2.245119 | -0.121508 |
| 6                        | -5.094045                     | 0.475426  | 0.002460  | 6                        | -4.261624                     | -1.553593 | -0.057219 |
| 6                        | -6.060969                     | 1.527747  | 0.007277  | 6                        | -4.537061                     | -0.098574 | -0.016021 |
| 6                        | -7.400952                     | 1.252687  | 0.006776  | 6                        | -5.702958                     | 0.279716  | 0.684201  |
| 6                        | -7.836522                     | -0.107646 | 0.001339  | 6                        | -6.114950                     | 1.600011  | 0.780961  |
| 6                        | -6.952343                     | -1.153475 | -0.003322 | 6                        | -5.369947                     | 2.590780  | 0.130737  |
| 6                        | -5.527236                     | -0.928984 | -0.002987 | 6                        | -4.237638                     | 2.250717  | -0.596085 |
| 1                        | -5.707982                     | 2.557196  | 0.011303  | 6                        | -3.809967                     | 0.917553  | -0.684273 |
| 1                        | -8.132243                     | 2.053854  | 0.010286  | 1                        | -6.282932                     | -0.502009 | 1.168622  |
| 1                        | -8.904262                     | -0.313320 | 0.001004  | 1                        | -7.007456                     | 1.856629  | 1.341912  |
| 1                        | -7.286341                     | -2.185819 | -0.007381 | 1                        | -5.679755                     | 3.630383  | 0.183080  |
| 1                        | -3.403321                     | 1.812606  | 0.008151  | 1                        | -3.656542                     | 3.000277  | -1.122608 |
| 8                        | -4.695941                     | -1.885591 | -0.007447 | 1                        | -5.177390                     | -2.152796 | -0.017626 |
| 1                        | 3.267769                      | 1.131068  | -0.004802 | 8                        | -2.733295                     | 0.706869  | -1.479992 |
| 1                        | -3.267786                     | -1.131068 | -0.004988 | 1                        | -2.357160                     | -0.176381 | -1.344228 |
| E (S <sub>0</sub> )      | -1031.73607915 E <sub>h</sub> |           |           | E (S <sub>0</sub> )      | -1031.72711410 E <sub>h</sub> |           |           |

| MKR1<br>Optimized GAUSSIAN |                               |           |           | MKR2<br>Optimized GAUSSIAN |                               |           |           |
|----------------------------|-------------------------------|-----------|-----------|----------------------------|-------------------------------|-----------|-----------|
| 6                          | 5.975409                      | -1.527579 | -0.702757 | 6                          | 7.401811                      | 0.832312  | 0.251579  |
| 6                          | 4.641668                      | -0.979090 | -0.651347 | 6                          | 5.966866                      | 1.116308  | 0.278123  |
| 6                          | 4.427038                      | 0.106319  | 0.315906  | 6                          | 5.079572                      | -0.055613 | 0.021115  |
| 6                          | 5.502086                      | 0.560490  | 1.140335  | 6                          | 5.652432                      | -1.350673 | -0.228178 |
| 6                          | 6.746866                      | 0.000856  | 1.046496  | 6                          | 7.001771                      | -1.533147 | -0.235660 |
| 6                          | 6.970913                      | -1.053829 | 0.109756  | 6                          | 7.879167                      | -0.417745 | 0.008982  |
| 1                          | 6.148856                      | -2.329441 | -1.412900 | 1                          | 8.062319                      | 1.673405  | 0.436141  |
| 1                          | 5.309771                      | 1.365487  | 1.847046  | 1                          | 5.003775                      | -2.205394 | -0.415756 |
| 1                          | 7.561061                      | 0.348802  | 1.673187  | 1                          | 7.426140                      | -2.513770 | -0.424945 |
| 1                          | 7.964584                      | -1.490647 | 0.044035  | 1                          | 8.952577                      | -0.591991 | -0.003092 |
| 8                          | 3.709175                      | -1.407723 | -1.394300 | 8                          | 5.521190                      | 2.251564  | 0.498850  |
| 6                          | 3.161878                      | 0.689962  | 0.426800  | 6                          | 3.728959                      | 0.219727  | 0.045122  |
| 7                          | 2.135588                      | 0.290447  | -0.323346 | 7                          | 2.718694                      | -0.652653 | -0.153106 |
| 1                          | 2.996294                      | 1.488765  | 1.146270  | 1                          | 3.461890                      | 1.252162  | 0.246548  |
| 6                          | 0.822599                      | 0.778523  | -0.338593 | 6                          | 1.336831                      | -0.393417 | -0.136010 |
| 6                          | -0.110954                     | 0.107678  | -1.146154 | 6                          | 0.462589                      | -1.463263 | -0.381097 |
| 6                          | -1.431901                     | 0.527375  | -1.204919 | 6                          | -0.912902                     | -1.272739 | -0.378341 |
| 6                          | -1.864711                     | 1.643449  | -0.460487 | 6                          | -1.458338                     | -0.001924 | -0.126317 |
| 6                          | -0.913444                     | 2.334773  | 0.315201  | 6                          | -0.574379                     | 1.068486  | 0.088065  |
| 6                          | 0.404549                      | 1.900495  | 0.393819  | 6                          | 0.801342                      | 0.883163  | 0.097382  |
| 1                          | 0.210324                      | -0.753108 | -1.725297 | 1                          | 0.866672                      | -2.450975 | -0.590464 |
| 1                          | -2.138535                     | 0.000926  | -1.837247 | 1                          | -1.564704                     | -2.109649 | -0.607072 |
| 1                          | -1.229590                     | 3.222797  | 0.852863  | 1                          | -0.988879                     | 2.055783  | 0.263668  |
| 1                          | 1.104607                      | 2.459354  | 1.005121  | 1                          | 1.446455                      | 1.734425  | 0.279109  |
| 7                          | -3.155408                     | 2.179409  | -0.573280 | 7                          | -2.835114                     | 0.272091  | -0.121522 |
| 6                          | -4.245273                     | 1.510698  | -0.473568 | 6                          | -3.702421                     | -0.614391 | 0.250379  |
| 6                          | -4.554658                     | 0.119840  | -0.070835 | 6                          | -5.127696                     | -0.369902 | 0.202306  |
| 6                          | -5.697074                     | -0.449671 | -0.674053 | 6                          | -6.026583                     | -1.368405 | 0.630526  |
| 6                          | -6.135157                     | -1.729619 | -0.371030 | 6                          | -7.396565                     | -1.167575 | 0.594853  |
| 6                          | -5.443412                     | -2.471441 | 0.593888  | 6                          | -7.894795                     | 0.057805  | 0.123653  |
| 6                          | -4.337405                     | -1.929253 | 1.233224  | 6                          | -7.038156                     | 1.063476  | -0.303214 |
| 6                          | -3.883707                     | -0.639748 | 0.919089  | 6                          | -5.648534                     | 0.868627  | -0.271000 |
| 1                          | -6.235746                     | 0.144294  | -1.408278 | 1                          | -5.620966                     | -2.310338 | 0.992403  |
| 1                          | -7.007376                     | -2.142568 | -0.866705 | 1                          | -8.075996                     | -1.945489 | 0.926451  |
| 1                          | -5.774886                     | -3.472068 | 0.855135  | 1                          | -8.967546                     | 0.225845  | 0.091778  |
| 1                          | -3.798610                     | -2.479413 | 1.997246  | 1                          | -7.413618                     | 2.013566  | -0.667785 |
| 1                          | -5.142886                     | 2.075955  | -0.745264 | 1                          | -3.386872                     | -1.592788 | 0.635198  |
| 8                          | -2.838370                     | -0.197084 | 1.660022  | 8                          | -4.849984                     | 1.860149  | -0.687416 |
| 1                          | -2.447983                     | 0.604064  | 1.279775  | 1                          | -3.910530                     | 1.543892  | -0.585742 |
| 1                          | 2.440542                      | -0.495112 | -0.958999 | 1                          | 2.968738                      | -1.615116 | -0.339112 |
| E (S <sub>0</sub> )        | -1031.71881902 E <sub>h</sub> |           |           | E (S <sub>0</sub> )        | -1031.72653511 E <sub>h</sub> |           |           |

| DKR1<br>Optimized GAUSSIAN |                               |           |           | DKR2<br>Optimized GAUSSIAN |                               |           |           |
|----------------------------|-------------------------------|-----------|-----------|----------------------------|-------------------------------|-----------|-----------|
| 6                          | -6.912668                     | 1.334625  | 0.007502  | 6                          | -7.499612                     | -0.739260 | -0.018782 |
| 6                          | -5.507005                     | 1.009571  | 0.005524  | 6                          | -6.078116                     | -1.084247 | -0.036909 |
| 6                          | -5.174924                     | -0.421958 | -0.012719 | 6                          | -5.139399                     | 0.075597  | -0.003147 |
| 6                          | -6.213913                     | -1.402901 | -0.031214 | 6                          | -5.654392                     | 1.417376  | 0.045931  |
| 6                          | -7.530957                     | -1.033597 | -0.028892 | 6                          | -6.994830                     | 1.655235  | 0.059289  |
| 6                          | -7.868735                     | 0.354247  | -0.008820 | 6                          | -7.921086                     | 0.552919  | 0.025065  |
| 1                          | -7.172718                     | 2.387919  | 0.022064  | 1                          | -8.197109                     | -1.570303 | -0.043333 |
| 1                          | -5.934828                     | -2.454717 | -0.046173 | 1                          | -4.968026                     | 2.262499  | 0.078226  |
| 1                          | -8.317349                     | -1.780645 | -0.041867 | 1                          | -7.375785                     | 2.670516  | 0.098112  |
| 1                          | -8.919154                     | 0.635305  | -0.006895 | 1                          | -8.986144                     | 0.772327  | 0.036584  |
| 8                          | -4.609484                     | 1.904006  | 0.017052  | 8                          | -5.682108                     | -2.258070 | -0.078162 |
| 6                          | -3.834499                     | -0.816498 | -0.016870 | 6                          | -3.802425                     | -0.257230 | -0.021671 |
| 7                          | -2.841054                     | 0.072242  | -0.003710 | 7                          | -2.752033                     | 0.590962  | -0.016529 |
| 1                          | -3.582304                     | -1.874489 | -0.039074 | 1                          | -3.581676                     | -1.319603 | -0.051757 |
| 6                          | -1.461053                     | -0.163526 | 0.007969  | 6                          | -1.384718                     | 0.264446  | -0.004345 |
| 6                          | -0.606564                     | 0.941997  | -0.131301 | 6                          | -0.450831                     | 1.300667  | -0.151088 |
| 6                          | 0.772868                      | 0.789537  | -0.133606 | 6                          | 0.914413                      | 1.047761  | -0.150230 |
| 6                          | 1.339272                      | -0.486077 | 0.012323  | 6                          | 1.384718                      | -0.264443 | 0.004400  |
| 6                          | 0.486920                      | -1.591649 | 0.154091  | 6                          | 0.450830                      | -1.300664 | 0.151144  |
| 6                          | -0.892670                     | -1.438025 | 0.154322  | 6                          | -0.914413                     | -1.047758 | 0.150286  |
| 1                          | -1.035163                     | 1.932403  | -0.250405 | 1                          | -0.797117                     | 2.323004  | -0.279572 |
| 1                          | 1.396808                      | 1.666016  | -0.260943 | 1                          | 1.600178                      | 1.875924  | -0.282195 |
| 1                          | 0.910424                      | -2.585214 | 0.277657  | 1                          | 0.797116                      | -2.323001 | 0.279627  |
| 1                          | -1.515521                     | -2.316044 | 0.283434  | 1                          | -1.600179                     | -1.875921 | 0.282253  |
| 7                          | 2.726298                      | -0.710691 | 0.019818  | 7                          | 2.752032                      | -0.590960 | 0.016583  |
| 6                          | 3.713283                      | 0.210912  | 0.032796  | 6                          | 3.802426                      | 0.257231  | 0.021715  |
| 6                          | 5.069869                      | -0.028458 | 0.001123  | 6                          | 5.139399                      | -0.075599 | 0.003200  |
| 6                          | 5.675132                      | -1.330629 | -0.079595 | 6                          | 5.654391                      | -1.417380 | -0.045848 |
| 6                          | 7.028476                      | -1.475913 | -0.107403 | 6                          | 6.994828                      | -1.655240 | -0.059251 |
| 6                          | 7.877912                      | -0.313833 | -0.055978 | 6                          | 7.921085                      | -0.552922 | -0.025151 |
| 6                          | 7.369647                      | 0.945156  | 0.018244  | 6                          | 7.499612                      | 0.739259  | 0.018663  |
| 6                          | 5.927872                      | 1.191837  | 0.053494  | 6                          | 6.078118                      | 1.084242  | 0.036972  |
| 1                          | 5.047991                      | -2.220092 | -0.126779 | 1                          | 4.968023                      | -2.262503 | -0.078099 |
| 1                          | 7.477509                      | -2.461700 | -0.171435 | 1                          | 7.375781                      | -2.670522 | -0.098064 |
| 1                          | 8.955304                      | -0.459727 | -0.079503 | 1                          | 8.986142                      | -0.772327 | -0.036756 |
| 1                          | 8.008866                      | 1.821346  | 0.055743  | 1                          | 8.197111                      | 1.570305  | 0.043082  |
| 1                          | 3.417680                      | 1.254193  | 0.081980  | 1                          | 3.581679                      | 1.319604  | 0.051792  |
| 8                          | 5.453443                      | 2.334443  | 0.122714  | 8                          | 5.682111                      | 2.258076  | 0.077938  |
| 1                          | -3.238109                     | 1.051926  | 0.000647  | 1                          | -2.955131                     | 1.581833  | -0.033175 |
| 1                          | 3.002611                      | -1.683822 | 0.024729  | 1                          | 2.955130                      | -1.581831 | 0.033239  |
| E (S <sub>0</sub> )        | -1031.71767403 E <sub>h</sub> |           |           | E (S <sub>0</sub> )        | -1031.70011001 E <sub>h</sub> |           |           |

### Stable Structures (Excited State):

| E<br>Optimized TURBOMOLE |                               |           |           | E*<br>Optimized TURBOMOLE |                               |           |           |
|--------------------------|-------------------------------|-----------|-----------|---------------------------|-------------------------------|-----------|-----------|
| 6                        | 7.037615                      | 0.864544  | -0.509497 | 6                         | 6.947338                      | 1.158574  | -0.318179 |
| 6                        | 5.638589                      | 0.746567  | -0.475750 | 6                         | 5.564150                      | 0.923417  | -0.239281 |
| 6                        | 5.046679                      | -0.347647 | 0.219335  | 6                         | 5.061415                      | -0.430556 | -0.253380 |
| 6                        | 5.885183                      | -1.283452 | 0.859977  | 6                         | 6.001248                      | -1.484034 | -0.349769 |
| 6                        | 7.265073                      | -1.159288 | 0.821120  | 6                         | 7.362405                      | -1.234081 | -0.429496 |
| 6                        | 7.834230                      | -0.076894 | 0.129755  | 6                         | 7.834865                      | 0.094430  | -0.414451 |
| 1                        | 7.468111                      | 1.704556  | -1.044921 | 1                         | 7.289469                      | 2.188435  | -0.304121 |
| 1                        | 5.424966                      | -2.115034 | 1.389519  | 1                         | 5.632162                      | -2.506880 | -0.360062 |
| 1                        | 7.897962                      | -1.887903 | 1.317516  | 1                         | 8.064293                      | -2.059413 | -0.501882 |
| 1                        | 8.915208                      | 0.029242  | 0.092365  | 1                         | 8.901858                      | 0.289046  | -0.477364 |
| 8                        | 4.897793                      | 1.672039  | -1.099473 | 8                         | 4.736349                      | 1.962423  | -0.149575 |
| 1                        | 3.941307                      | 1.423238  | -0.960524 | 1                         | 3.799379                      | 1.578314  | -0.091834 |
| 6                        | 3.608800                      | -0.508500 | 0.275465  | 6                         | 3.659045                      | -0.702439 | -0.170047 |
| 7                        | 2.797685                      | 0.328645  | -0.288851 | 7                         | 2.777348                      | 0.285507  | -0.066390 |
| 1                        | 3.233262                      | -1.374135 | 0.836819  | 1                         | 3.352929                      | -1.751341 | -0.171947 |
| 6                        | 1.407235                      | 0.127728  | -0.276467 | 6                         | 1.423811                      | 0.097743  | -0.060307 |
| 6                        | 0.581498                      | 1.264708  | -0.306321 | 6                         | 0.609148                      | 1.232084  | 0.226770  |
| 6                        | -0.802295                     | 1.143172  | -0.296888 | 6                         | -0.762069                     | 1.148913  | 0.276436  |
| 6                        | -1.407235                     | -0.127728 | -0.276467 | 6                         | -1.425779                     | -0.096349 | 0.029481  |
| 6                        | -0.581498                     | -1.264708 | -0.306321 | 6                         | -0.612832                     | -1.222002 | -0.294870 |
| 6                        | 0.802295                      | -1.143172 | -0.296888 | 6                         | 0.758724                      | -1.140670 | -0.336570 |
| 1                        | 1.048727                      | 2.244468  | -0.335796 | 1                         | 1.111056                      | 2.177575  | 0.412077  |
| 1                        | -1.418010                     | 2.036247  | -0.347382 | 1                         | -1.340108                     | 2.043426  | 0.482188  |
| 1                        | 1.048727                      | -2.244468 | -0.335796 | 1                         | -1.115981                     | -2.161441 | -0.505838 |
| 1                        | 1.418010                      | -2.036247 | -0.347382 | 1                         | 1.333594                      | -2.021002 | -0.603157 |
| 7                        | -2.797685                     | -0.328645 | -0.288851 | 7                         | -2.778004                     | -0.289418 | 0.061213  |
| 6                        | -3.608800                     | 0.508500  | 0.275465  | 6                         | -3.642504                     | 0.619357  | 0.498948  |
| 6                        | -5.046679                     | 0.347647  | 0.219335  | 6                         | -5.052666                     | 0.389911  | 0.422592  |
| 6                        | -5.885183                     | 1.283452  | 0.859977  | 6                         | -5.972717                     | 1.352071  | 0.902918  |
| 6                        | -7.265073                     | 1.159288  | 0.821120  | 6                         | -7.341022                     | 1.141158  | 0.835373  |
| 6                        | -7.834230                     | 0.076894  | 0.129755  | 6                         | -7.841154                     | -0.054448 | 0.279820  |
| 6                        | -7.037615                     | -0.864544 | -0.509497 | 6                         | -6.973667                     | -1.027299 | -0.200331 |
| 6                        | -5.638589                     | -0.746567 | -0.475750 | 6                         | -5.583895                     | -0.828667 | -0.142817 |
| 1                        | -5.424966                     | 2.115034  | 1.389519  | 1                         | -5.582226                     | 2.272002  | 1.331779  |
| 1                        | -7.897962                     | 1.887903  | 1.317516  | 1                         | -8.027399                     | 1.894075  | 1.210906  |
| 1                        | -8.915208                     | -0.029242 | 0.092365  | 1                         | -8.913856                     | -0.218154 | 0.227194  |
| 1                        | -7.468111                     | -1.704556 | -1.044921 | 1                         | -7.337370                     | -1.954948 | -0.630587 |
| 1                        | -3.233262                     | 1.374135  | 0.836819  | 1                         | -3.312878                     | 1.557307  | 0.952898  |
| 8                        | -4.897793                     | -1.672039 | -1.099473 | 6                         | -4.775742                     | -1.777184 | -0.612484 |
| 1                        | -3.941307                     | -1.423238 | -0.960524 | 1                         | -3.828714                     | -1.445443 | -0.465857 |
| E (S <sub>0</sub> )      | -1031.11748921 E <sub>n</sub> |           |           | E (S <sub>1</sub> )       | -1031.01120014 E <sub>n</sub> |           |           |
| E (S <sub>1</sub> )      | -1031.00104426 E <sub>n</sub> |           |           |                           |                               |           |           |



| MK<br>Optimized TURBOMOLE |                |                |           | MK*<br>Optimized TURBOMOLE |                |                |           |
|---------------------------|----------------|----------------|-----------|----------------------------|----------------|----------------|-----------|
| 6                         | -6.927566      | 1.223234       | 0.144415  | 6                          | -6.969390      | 1.205612       | 0.093754  |
| 6                         | -5.507373      | 0.963550       | 0.139566  | 6                          | -5.552277      | 0.948064       | 0.083474  |
| 6                         | -5.107850      | -0.437907      | -0.053499 | 6                          | -5.145669      | -0.447398      | -0.010167 |
| 6                         | -6.099146      | -1.454418      | -0.218615 | 6                          | -6.100818      | -1.443244      | -0.081597 |
| 6                         | -7.432864      | -1.147199      | -0.204264 | 6                          | -7.496051      | -1.149777      | -0.067561 |
| 6                         | -7.836504      | 0.211341       | -0.020185 | 6                          | -7.911018      | 0.173520       | 0.019701  |
| 1                         | -7.237114      | 2.254104       | 0.284956  | 1                          | -7.273949      | 2.244965       | 0.162511  |
| 1                         | -5.770248      | -2.482940      | -0.357635 | 1                          | -5.785412      | -2.482535      | -0.150724 |
| 1                         | -8.182905      | -1.921380      | -0.330555 | 1                          | -8.214794      | -1.959734      | -0.125284 |
| 1                         | -8.899379      | 0.443240       | -0.010742 | 1                          | -8.970728      | 0.411264       | 0.030898  |
| 8                         | -4.654022      | 1.887726       | 0.294089  | 8                          | -4.703487      | 1.891524       | 0.152785  |
| 6                         | -3.749827      | -0.770739      | -0.069225 | 6                          | -3.732819      | -0.805655      | -0.030079 |
| 7                         | -2.799150      | 0.150942       | 0.085786  | 7                          | -2.798916      | 0.102476       | 0.036039  |
| 1                         | -3.447778      | -1.807301      | -0.203757 | 1                          | -3.447743      | -1.851650      | -0.101981 |
| 6                         | -1.408399      | -0.019982      | 0.081722  | 6                          | -1.395844      | -0.032887      | 0.026728  |
| 6                         | -0.616526      | 1.088972       | 0.423755  | 6                          | -0.630186      | 1.139339       | 0.137202  |
| 6                         | 0.768815       | 0.992571       | 0.439661  | 6                          | 0.752749       | 1.085402       | 0.132582  |
| 6                         | 1.407427       | -0.217091      | 0.109581  | 6                          | 1.435949       | -0.160076      | 0.008901  |
| 6                         | 0.607146       | -1.329017      | -0.205469 | 6                          | 0.633357       | -1.331956      | -0.087010 |
| 6                         | -0.777932      | -1.234991      | -0.235578 | 6                          | -0.745108      | -1.280740      | -0.082589 |
| 1                         | -1.100208      | 2.023358       | 0.694643  | 1                          | -1.134034      | 2.098689       | 0.235067  |
| 1                         | 1.357040       | 1.852869       | 0.743973  | 1                          | 1.311086       | 2.007608       | 0.245129  |
| 1                         | 1.096158       | -2.267040      | -0.449657 | 1                          | 1.144417       | -2.285753      | -0.174084 |
| 1                         | -1.358970      | -2.108673      | -0.511465 | 1                          | -1.309441      | -2.204841      | -0.166779 |
| 6                         | 2.800377       | -0.392995      | 0.111019  | 6                          | 2.796022       | -0.331178      | -0.012538 |
| 6                         | 3.607882       | 0.579229       | -0.174153 | 6                          | 3.652258       | 0.681655       | -0.092588 |
| 6                         | 5.046530       | 0.429324       | -0.122447 | 6                          | 5.066268       | 0.476131       | -0.058125 |
| 6                         | 5.879664       | 1.518037       | -0.455232 | 6                          | 5.958118       | 1.574896       | -0.156049 |
| 6                         | 7.260403       | 1.406559       | -0.415291 | 6                          | 7.332017       | 1.401509       | -0.123260 |
| 6                         | 7.836373       | 0.182198       | -0.036846 | 6                          | 7.864047       | 0.107722       | 0.009430  |
| 6                         | 7.045570       | -0.910476      | 0.295001  | 6                          | 7.020203       | -0.997349      | 0.106655  |
| 6                         | 5.645584       | -0.806815      | 0.257598  | 6                          | 5.629911       | -0.837241      | 0.074904  |
| 1                         | 5.414418       | 2.457722       | -0.745320 | 1                          | 5.535684       | 2.572495       | -0.257839 |
| 1                         | 7.889124       | 2.252883       | -0.672564 | 1                          | 7.993144       | 2.259868       | -0.199146 |
| 1                         | 8.918222       | 0.084197       | -0.002939 | 1                          | 8.940762       | -0.036867      | 0.036000  |
| 1                         | 7.481405       | -1.860239      | 0.587505  | 1                          | 7.414499       | -2.003817      | 0.208434  |
| 1                         | 3.228338       | 1.560950       | -0.486043 | 1                          | 3.310644       | 1.714192       | -0.212157 |
| 8                         | 4.910473       | -1.879222      | 0.579918  | 8                          | 4.846323       | -1.924016      | 0.167743  |
| 1                         | 3.952822       | -1.615873      | 0.487894  | 1                          | 3.899487       | -1.593203      | 0.119078  |
| 1                         | -3.240010      | 1.101290       | 0.220397  | 1                          | -3.219263      | 1.062984       | 0.102543  |
| E (S <sub>0</sub> )       | -1031.10941466 | E <sub>h</sub> |           | E (S <sub>1</sub> )        | -1031.01727473 | E <sub>h</sub> |           |
| E (S <sub>1</sub> )       | -1031.00802837 | E <sub>h</sub> |           |                            |                |                |           |

| DK*                 |                               |           |           | ER                  |                               |           |           |
|---------------------|-------------------------------|-----------|-----------|---------------------|-------------------------------|-----------|-----------|
| Optimized TURBOMOLE |                               |           |           | Optimized TURBOMOLE |                               |           |           |
| 6                   | 6.989175                      | 1.160213  | 0.019326  | 6                   | 6.206425                      | 0.631281  | 1.093855  |
| 6                   | 5.564855                      | 0.930288  | 0.012772  | 6                   | 4.864672                      | 0.236959  | 0.965073  |
| 6                   | 5.127706                      | -0.461465 | -0.005741 | 6                   | 4.286167                      | 0.143135  | -0.333826 |
| 6                   | 6.061875                      | -1.482222 | -0.016941 | 6                   | 5.078140                      | 0.454796  | -1.458293 |
| 6                   | 7.456208                      | -1.213920 | -0.010757 | 6                   | 6.401324                      | 0.844120  | -1.321638 |
| 6                   | 7.901827                      | 0.107634  | 0.007486  | 6                   | 6.958970                      | 0.928887  | -0.035116 |
| 1                   | 7.314639                      | 2.195190  | 0.033454  | 1                   | 6.628136                      | 0.695351  | 2.091748  |
| 1                   | 5.725183                      | -2.516649 | -0.030634 | 1                   | 4.627628                      | 0.382910  | -2.445982 |
| 1                   | 8.160870                      | -2.038063 | -0.020126 | 1                   | 6.998940                      | 1.081112  | -2.195988 |
| 1                   | 8.967115                      | 0.318673  | 0.012600  | 1                   | 7.995855                      | 1.232512  | 0.082930  |
| 8                   | 4.736998                      | 1.890765  | 0.022517  | 8                   | 4.164049                      | -0.038656 | 2.072910  |
| 6                   | 3.710257                      | -0.787653 | -0.011611 | 1                   | 3.242233                      | -0.286448 | -1.782309 |
| 7                   | 2.793733                      | 0.134443  | 0.001475  | 6                   | 2.906734                      | -0.260392 | -0.510653 |
| 1                   | 3.405908                      | -1.830884 | -0.027039 | 7                   | 2.135097                      | -0.540001 | 0.490825  |
| 6                   | 1.382198                      | 0.019244  | 0.001645  | 1                   | 2.535246                      | -0.303276 | -1.543077 |
| 6                   | 0.636535                      | 1.205354  | -0.005426 | 6                   | 0.815354                      | -0.981879 | 0.297734  |
| 6                   | -0.748507                     | 1.175561  | -0.007169 | 6                   | -0.141991                     | -0.636884 | 1.268120  |
| 6                   | -1.440140                     | -0.066783 | -0.001151 | 6                   | -1.468255                     | -1.025280 | 1.135567  |
| 6                   | -0.663038                     | -1.260520 | 0.007463  | 6                   | -1.877763                     | -1.809834 | 0.036624  |
| 6                   | 0.714730                      | -1.222522 | 0.008886  | 6                   | -0.904610                     | -2.212722 | -0.899738 |
| 1                   | 1.151931                      | 2.163276  | -0.010447 | 6                   | 0.415505                      | -1.788034 | -0.783407 |
| 1                   | -1.296698                     | 2.109603  | -0.012491 | 1                   | 0.173132                      | -0.039641 | 2.118415  |
| 1                   | -1.179733                     | -2.215514 | 0.014136  | 1                   | -2.197935                     | -0.742179 | 1.887292  |
| 1                   | 1.264123                      | -2.159288 | 0.018156  | 1                   | -1.204002                     | -2.870634 | -1.709924 |
| 6                   | -2.795227                     | -0.180091 | -0.001956 | 1                   | 1.150892                      | -2.126910 | -1.507037 |
| 6                   | -3.736834                     | 0.819268  | -0.008746 | 7                   | -3.177539                     | -2.324726 | -0.078069 |
| 6                   | -5.096535                     | 0.503497  | -0.004762 | 6                   | -4.252390                     | -1.628283 | -0.016617 |
| 6                   | -6.083343                     | 1.537965  | -0.011738 | 6                   | -4.520515                     | -0.171294 | 0.021881  |
| 6                   | -7.428491                     | 1.249058  | -0.007106 | 6                   | -5.685435                     | 0.214134  | 0.721085  |
| 6                   | -7.856819                     | -0.105250 | 0.004765  | 6                   | -6.090263                     | 1.537502  | 0.816514  |
| 6                   | -6.945922                     | -1.142049 | 0.011572  | 6                   | -5.338589                     | 2.524105  | 0.165981  |
| 6                   | -5.531971                     | -0.909033 | 0.007118  | 6                   | -4.206982                     | 2.176654  | -0.559618 |
| 1                   | -5.744447                     | 2.572874  | -0.020708 | 6                   | -3.786340                     | 0.840378  | -0.646580 |
| 1                   | -8.162094                     | 2.050243  | -0.012397 | 1                   | -6.270214                     | -0.564286 | 1.206031  |
| 1                   | -8.922018                     | -0.325623 | 0.008514  | 1                   | -6.982212                     | 1.799716  | 1.376694  |
| 1                   | -7.266818                     | -2.179627 | 0.020601  | 1                   | -5.642550                     | 3.565995  | 0.217400  |
| 1                   | -3.404021                     | 1.851938  | -0.017433 | 1                   | -3.620767                     | 2.922737  | -1.086371 |
| 8                   | -4.689562                     | -1.870760 | 0.013160  | 1                   | -5.171498                     | -2.223244 | 0.022607  |
| 1                   | 3.223207                      | 1.090459  | 0.013364  | 8                   | -2.709673                     | 0.622708  | -1.440562 |
| 1                   | -3.296855                     | -1.117630 | 0.005367  | 1                   | -2.334978                     | -0.260387 | -1.299139 |
| E (S <sub>1</sub> ) | -1031.01158215 E <sub>h</sub> |           |           | E (S <sub>0</sub> ) | -1031.09195084 E <sub>h</sub> |           |           |
|                     |                               |           |           | E (S <sub>1</sub> ) | -1030.92083027 E <sub>h</sub> |           |           |

| MKR1<br>Optimized TURBOMOLE |                               |           |           |
|-----------------------------|-------------------------------|-----------|-----------|
| 6                           | 5.971685                      | -1.503617 | -0.743236 |
| 6                           | 4.638816                      | -0.951370 | -0.692927 |
| 6                           | 4.424216                      | 0.129435  | 0.280130  |
| 6                           | 5.498320                      | 0.576636  | 1.110671  |
| 6                           | 6.742752                      | 0.014332  | 1.016953  |
| 6                           | 6.966826                      | -1.036530 | 0.074781  |
| 1                           | 6.144940                      | -2.302754 | -1.457095 |
| 1                           | 5.305841                      | 1.378367  | 1.821519  |
| 1                           | 7.556595                      | 0.357096  | 1.647755  |
| 1                           | 7.960026                      | -1.475663 | 0.009431  |
| 8                           | 3.706886                      | -1.373093 | -1.441379 |
| 6                           | 3.159095                      | 0.715139  | 0.390181  |
| 7                           | 2.134957                      | 0.321453  | -0.367088 |
| 1                           | 2.991798                      | 1.510119  | 1.113876  |
| 6                           | 0.822112                      | 0.811105  | -0.383112 |
| 6                           | -0.111791                     | 0.143482  | -1.194081 |
| 6                           | -1.433094                     | 0.564096  | -1.251769 |
| 6                           | -1.865339                     | 1.678873  | -0.504262 |
| 6                           | -0.913630                     | 2.367981  | 0.273809  |
| 6                           | 0.404578                      | 1.932053  | 0.352040  |
| 1                           | 0.209440                      | -0.716041 | -1.776051 |
| 1                           | -2.140695                     | 0.039589  | -1.885502 |
| 1                           | -1.229526                     | 3.255214  | 0.813942  |
| 1                           | 1.104875                      | 2.488776  | 0.965867  |
| 6                           | -3.157272                     | 2.212914  | -0.613600 |
| 6                           | -4.245648                     | 1.541580  | -0.510421 |
| 6                           | -4.547175                     | 0.148668  | -0.106181 |
| 6                           | -5.683187                     | -0.431535 | -0.712743 |
| 6                           | -6.110870                     | -1.715743 | -0.409200 |
| 6                           | -5.416055                     | -2.449979 | 0.560394  |
| 6                           | -4.316613                     | -1.896604 | 1.203190  |
| 6                           | -3.872115                     | -0.603551 | 0.887652  |
| 1                           | -6.224765                     | 0.156888  | -1.449820 |
| 1                           | -6.977530                     | -2.137905 | -0.907827 |
| 1                           | -5.739883                     | -3.453367 | 0.822568  |
| 1                           | -3.775912                     | -2.440443 | 1.970891  |
| 1                           | -5.146559                     | 2.104271  | -0.779270 |
| 8                           | -2.832397                     | -0.150091 | 1.630119  |
| 1                           | -2.446607                     | 0.651521  | 1.246586  |
| 1                           | 2.442904                      | -0.461303 | -1.006789 |
| E (S <sub>0</sub> )         | -1031.08357418 E <sub>h</sub> |           |           |
| E (S <sub>1</sub> )         | -1030.97936330 E <sub>h</sub> |           |           |

| MKR2<br>Optimized TURBOMOLE |                               |           |           | MKR2*<br>Optimized TURBOMOLE |                               |           |           |
|-----------------------------|-------------------------------|-----------|-----------|------------------------------|-------------------------------|-----------|-----------|
| 6                           | 7.443967                      | 1.009556  | 0.250304  | 6                            | -7.327862                     | -0.688889 | 1.253024  |
| 6                           | 6.008776                      | 1.297219  | 0.252821  | 6                            | -5.878049                     | -0.781504 | 1.306695  |
| 6                           | 5.122064                      | 0.121981  | 0.006456  | 6                            | -5.129940                     | -0.149656 | 0.207604  |
| 6                           | 5.695192                      | -1.178844 | -0.213761 | 6                            | -5.810391                     | 0.491826  | -0.817486 |
| 6                           | 7.044733                      | -1.364171 | -0.201351 | 6                            | -7.215725                     | 0.551439  | -0.821829 |
| 6                           | 7.921972                      | -0.246005 | 0.035511  | 6                            | -7.962492                     | -0.039786 | 0.215300  |
| 1                           | 8.104090                      | 1.852851  | 0.428709  | 1                            | -7.875163                     | -1.154043 | 2.065101  |
| 1                           | 5.046531                      | -2.035783 | -0.393615 | 1                            | -5.276874                     | 0.959089  | -1.640358 |
| 1                           | 7.469480                      | -2.349161 | -0.368362 | 1                            | -7.723792                     | 1.057893  | -1.634435 |
| 1                           | 8.995523                      | -0.422829 | 0.040726  | 1                            | -9.045817                     | 0.019350  | 0.190835  |
| 8                           | 5.562614                      | 2.437499  | 0.446576  | 8                            | -5.292465                     | -1.367702 | 2.238866  |
| 6                           | 3.771143                      | 0.399498  | 0.014233  | 6                            | -3.687144                     | -0.265536 | 0.300710  |
| 7                           | 2.761070                      | -0.475392 | -0.178900 | 7                            | -2.818600                     | 0.223488  | -0.512810 |
| 1                           | 3.503786                      | 1.435895  | 0.196840  | 1                            | -3.298103                     | -0.823476 | 1.149473  |
| 6                           | 1.378673                      | -0.216505 | -0.165279 | 6                            | -1.367313                     | 0.074417  | -0.390729 |
| 6                           | 0.505000                      | -1.286906 | -0.413964 | 6                            | -0.623544                     | 1.063117  | 0.257704  |
| 6                           | -0.871290                     | -1.097849 | -0.410475 | 6                            | 0.757713                      | 0.966127  | 0.310259  |
| 6                           | -1.418393                     | 0.172186  | -0.154454 | 6                            | 1.459905                      | -0.124675 | -0.307872 |
| 6                           | -0.534824                     | 1.243545  | 0.061529  | 6                            | 0.647603                      | -1.093848 | -0.980019 |
| 6                           | 0.841745                      | 1.059675  | 0.070279  | 6                            | -0.727422                     | -1.001287 | -1.032859 |
| 1                           | 0.910228                      | -2.274001 | -0.626093 | 1                            | -1.124225                     | 1.908553  | 0.725143  |
| 1                           | -1.522147                     | -1.935512 | -0.641386 | 1                            | 1.310369                      | 1.745520  | 0.820690  |
| 1                           | -0.950524                     | 2.230150  | 0.240800  | 1                            | 1.154509                      | -1.928106 | -1.454799 |
| 1                           | 1.486070                      | 1.911403  | 0.255359  | 1                            | -1.307325                     | -1.756751 | -1.557351 |
| 7                           | -2.795731                     | 0.444560  | -0.141950 | 7                            | 2.799827                      | -0.305293 | -0.321168 |
| 6                           | -3.661516                     | -0.446257 | 0.225376  | 6                            | 3.657929                      | 0.501109  | 0.347853  |
| 6                           | -5.087257                     | -0.199343 | 0.191227  | 6                            | 5.064998                      | 0.328938  | 0.255883  |
| 6                           | -5.985189                     | -1.202402 | 0.612711  | 6                            | 5.958068                      | 1.171638  | 0.973366  |
| 6                           | -7.355467                     | -0.996856 | 0.592745  | 6                            | 7.334684                      | 1.023898  | 0.891560  |
| 6                           | -7.854576                     | 0.237713  | 0.144732  | 6                            | 7.881961                      | 0.017680  | 0.081519  |
| 6                           | -6.998591                     | 1.247652  | -0.275481 | 6                            | 7.037124                      | -0.833326 | -0.638752 |
| 6                           | -5.608601                     | 1.048248  | -0.259294 | 6                            | 5.649933                      | -0.698633 | -0.566809 |
| 1                           | -5.578923                     | -2.151317 | 0.956520  | 1                            | 5.531019                      | 1.952331  | 1.600397  |
| 1                           | -8.034686                     | -1.777985 | 0.918737  | 1                            | 7.985924                      | 1.687547  | 1.454543  |
| 1                           | -8.927570                     | 0.409441  | 0.126109  | 1                            | 8.959144                      | -0.104933 | 0.010925  |
| 1                           | -7.374830                     | 2.204701  | -0.621907 | 1                            | 7.436451                      | -1.621061 | -1.271075 |
| 1                           | -3.343769                     | -1.429547 | 0.596698  | 1                            | 3.300756                      | 1.298205  | 1.004090  |
| 8                           | -4.809850                     | 2.042812  | -0.667740 | 8                            | 4.870073                      | -1.542180 | -1.274636 |
| 1                           | -3.870612                     | 1.720371  | -0.577938 | 1                            | 3.920097                      | -1.272586 | -1.071744 |
| 1                           | 3.011688                      | -1.440294 | -0.353046 | 1                            | -3.163553                     | 0.753735  | -1.312910 |
| E (S <sub>0</sub> )         | -1031.09134748 E <sub>h</sub> |           |           | E (S <sub>1</sub> )          | -1031.00610148 E <sub>h</sub> |           |           |
| E (S <sub>1</sub> )         | -1030.99046611 E <sub>h</sub> |           |           |                              |                               |           |           |

| DKR1<br>Optimized TURBOMOLE |                               |           |           | DKR2<br>Optimized TURBOMOLE |                               |           |           |
|-----------------------------|-------------------------------|-----------|-----------|-----------------------------|-------------------------------|-----------|-----------|
| 6                           | -6.872557                     | 1.520565  | -0.004393 | 6                           | -7.502842                     | -0.740202 | -0.020468 |
| 6                           | -5.467309                     | 1.190777  | -0.002290 | 6                           | -6.080518                     | -1.084712 | -0.035912 |
| 6                           | -5.139546                     | -0.242263 | 0.005039  | 6                           | -5.142352                     | 0.076214  | -0.001382 |
| 6                           | -6.181693                     | -1.220792 | 0.007120  | 6                           | -5.658107                     | 1.418376  | 0.046061  |
| 6                           | -7.498340                     | -0.847099 | 0.004854  | 6                           | -6.999355                     | 1.655703  | 0.057234  |
| 6                           | -7.832215                     | 0.542595  | -0.000697 | 6                           | -7.925537                     | 0.552326  | 0.022163  |
| 1                           | -7.129161                     | 2.575180  | -0.009227 | 1                           | -8.199953                     | -1.572097 | -0.046209 |
| 1                           | -5.905868                     | -2.274092 | 0.011443  | 1                           | -4.971850                     | 2.264190  | 0.078737  |
| 1                           | -8.287458                     | -1.592131 | 0.007235  | 1                           | -7.381124                     | 2.671193  | 0.094673  |
| 1                           | -8.882255                     | 0.826693  | -0.002287 | 1                           | -8.991199                     | 0.771277  | 0.031884  |
| 8                           | -4.566307                     | 2.082610  | -0.008026 | 8                           | -5.683746                     | -2.258666 | -0.075752 |
| 6                           | -3.799244                     | -0.640047 | 0.005233  | 6                           | -3.804680                     | -0.256860 | -0.017889 |
| 7                           | -2.804526                     | 0.248168  | 0.000511  | 7                           | -2.753522                     | 0.591648  | -0.011965 |
| 1                           | -3.549358                     | -1.699186 | 0.003029  | 1                           | -3.584904                     | -1.320005 | -0.046585 |
| 6                           | -1.424346                     | 0.011450  | 0.007609  | 6                           | -1.385646                     | 0.264871  | -0.001288 |
| 6                           | -0.569423                     | 1.118770  | -0.121132 | 6                           | -0.451446                     | 1.302414  | -0.143138 |
| 6                           | 0.810636                      | 0.966364  | -0.127367 | 6                           | 0.914607                      | 1.050070  | -0.143515 |
| 6                           | 1.377400                      | -0.311213 | 0.003857  | 6                           | 1.385643                      | -0.263423 | 0.003888  |
| 6                           | 0.524687                      | -1.418880 | 0.133479  | 6                           | 0.451444                      | -1.300928 | 0.145985  |
| 6                           | -0.855540                     | -1.265341 | 0.137284  | 6                           | -0.914601                     | -1.048567 | 0.146550  |
| 1                           | -0.998437                     | 2.110816  | -0.227801 | 1                           | -0.797930                     | 2.325750  | -0.266350 |
| 1                           | 1.434347                      | 1.844795  | -0.245640 | 1                           | 1.600145                      | 1.879876  | -0.270125 |
| 1                           | 0.948775                      | -2.414268 | 0.243402  | 1                           | 0.797922                      | -2.324291 | 0.269008  |
| 1                           | -1.478011                     | -2.145913 | 0.253626  | 1                           | -1.600149                     | -1.878280 | 0.273758  |
| 7                           | 2.765006                      | -0.535820 | 0.008746  | 7                           | 2.753447                      | -0.590460 | 0.013764  |
| 6                           | 3.751291                      | 0.387268  | 0.034279  | 6                           | 3.804966                      | 0.257603  | 0.016406  |
| 6                           | 5.109118                      | 0.151051  | 0.007227  | 6                           | 5.142446                      | -0.076241 | -0.000138 |
| 6                           | 5.718624                      | -1.149231 | -0.079263 | 6                           | 5.657399                      | -1.418861 | -0.043199 |
| 6                           | 7.073205                      | -1.290458 | -0.099621 | 6                           | 6.998501                      | -1.657028 | -0.054121 |
| 6                           | 7.919517                      | -0.125899 | -0.035054 | 6                           | 7.925350                      | -0.554088 | -0.022991 |
| 6                           | 7.406787                      | 1.131546  | 0.044825  | 6                           | 7.503430                      | 0.738831  | 0.015312  |
| 6                           | 5.963433                      | 1.373923  | 0.073563  | 6                           | 6.081310                      | 1.084250  | 0.029792  |
| 1                           | 5.094195                      | -2.040525 | -0.135804 | 1                           | 4.970635                      | -2.264390 | -0.072441 |
| 1                           | 7.525770                      | -2.274945 | -0.167368 | 1                           | 7.379651                      | -2.672861 | -0.088493 |
| 1                           | 8.997931                      | -0.268882 | -0.052964 | 1                           | 8.990880                      | -0.773707 | -0.032237 |
| 1                           | 8.043193                      | 2.009804  | 0.092167  | 1                           | 8.201044                      | 1.570392  | 0.038012  |
| 1                           | 3.453921                      | 1.430074  | 0.091359  | 1                           | 3.585762                      | 1.320935  | 0.041976  |
| 8                           | 5.485249                      | 2.514869  | 0.148822  | 8                           | 5.685260                      | 2.258586  | 0.065215  |
| 1                           | -3.202825                     | 1.228900  | -0.010091 | 1                           | -2.956605                     | 1.582888  | -0.027730 |
| 1                           | 3.041334                      | -1.509228 | 0.004320  | 1                           | 2.956224                      | -1.581727 | 0.031511  |
| E (S <sub>0</sub> )         | -1031.08243072 E <sub>h</sub> |           |           | E (S <sub>0</sub> )         | -1031.06480619 E <sub>h</sub> |           |           |
| E (S <sub>1</sub> )         | -1031.13341903 E <sub>h</sub> |           |           | E (S <sub>1</sub> )         | -1031.11714720 E <sub>h</sub> |           |           |

**Possible Degeneracy Points (“Conical Intersections”):**

| CI E <sub>0</sub> -ER<br>TURBOMOLE |                               |           |           | CI MK <sub>0</sub> -MKR1<br>TURBOMOLE |                               |           |           |
|------------------------------------|-------------------------------|-----------|-----------|---------------------------------------|-------------------------------|-----------|-----------|
| 6                                  | -6.347102                     | 1.134666  | 1.005702  | 6                                     | -6.512668                     | 0.586872  | -0.404304 |
| 6                                  | -5.025080                     | 0.927391  | 0.579264  | 6                                     | -5.086919                     | 0.350227  | -0.464042 |
| 6                                  | -4.639996                     | -0.359026 | 0.082013  | 6                                     | -4.659072                     | -1.051801 | -0.642830 |
| 6                                  | -5.604005                     | -1.396102 | 0.055150  | 6                                     | -5.639776                     | -2.085938 | -0.743583 |
| 6                                  | -6.897802                     | -1.182148 | 0.490389  | 6                                     | -6.976908                     | -1.798058 | -0.679904 |
| 6                                  | -7.264061                     | 0.094565  | 0.960188  | 6                                     | -7.406392                     | -0.443231 | -0.508406 |
| 1                                  | -6.619195                     | 2.118253  | 1.373575  | 1                                     | -6.833312                     | 1.615131  | -0.273118 |
| 1                                  | -5.306440                     | -2.371005 | -0.323556 | 1                                     | -5.301227                     | -3.111557 | -0.873834 |
| 1                                  | -7.624394                     | -1.987616 | 0.471928  | 1                                     | -7.716508                     | -2.588557 | -0.757837 |
| 1                                  | -8.282126                     | 0.270762  | 1.296288  | 1                                     | -8.472618                     | -0.235028 | -0.459183 |
| 8                                  | -4.153991                     | 1.934693  | 0.674882  | 8                                     | -4.248724                     | 1.289604  | -0.367677 |
| 1                                  | -3.270082                     | 1.588556  | 0.367210  | 6                                     | -3.297804                     | -1.368654 | -0.698857 |
| 6                                  | -3.318732                     | -0.597517 | -0.421856 | 7                                     | -2.347179                     | -0.428458 | -0.596413 |
| 7                                  | -2.341421                     | 0.258932  | -0.222730 | 1                                     | -2.985214                     | -2.402331 | -0.817201 |
| 1                                  | -3.123246                     | -1.598768 | -0.819812 | 6                                     | -0.975095                     | -0.568621 | -0.626375 |
| 6                                  | -1.049313                     | 0.050797  | -0.638662 | 6                                     | -0.184904                     | 0.577790  | -0.332881 |
| 6                                  | -0.109137                     | 1.075949  | -0.312967 | 6                                     | 1.183051                      | 0.507753  | -0.298867 |
| 6                                  | 1.208534                      | 0.981895  | -0.661320 | 6                                     | 1.883087                      | -0.727868 | -0.597045 |
| 6                                  | 1.703422                      | -0.172078 | -1.391535 | 6                                     | 1.046313                      | -1.875184 | -0.901010 |
| 6                                  | 0.728451                      | -1.202099 | -1.719982 | 6                                     | -0.319758                     | -1.796552 | -0.920934 |
| 6                                  | -0.581257                     | -1.096127 | -1.357475 | 1                                     | -0.688846                     | 1.516182  | -0.115715 |
| 1                                  | -0.476394                     | 1.944410  | 0.225188  | 1                                     | 1.768234                      | 1.392339  | -0.078482 |
| 1                                  | 1.894840                      | 1.773991  | -0.391336 | 1                                     | 1.550991                      | -2.802112 | -1.150319 |
| 1                                  | 1.082971                      | -2.064138 | -2.274605 | 1                                     | -0.896809                     | -2.676243 | -1.188441 |
| 1                                  | -1.264705                     | -1.893515 | -1.629374 | 7                                     | 3.188035                      | -0.880895 | -0.656930 |
| 7                                  | 2.926486                      | -0.350014 | -1.805479 | 6                                     | 4.118285                      | 0.154600  | -0.699993 |
| 6                                  | 3.946746                      | 0.515696  | -1.350956 | 6                                     | 4.792702                      | 0.813710  | 0.332690  |
| 6                                  | 4.740683                      | 0.312436  | -0.214331 | 6                                     | 5.754341                      | 1.826138  | -0.001391 |
| 6                                  | 5.690071                      | 1.310302  | 0.185267  | 6                                     | 6.370165                      | 2.586942  | 0.971089  |
| 6                                  | 6.458551                      | 1.171305  | 1.324717  | 6                                     | 6.064066                      | 2.378419  | 2.327924  |
| 6                                  | 6.324475                      | 0.026097  | 2.130474  | 6                                     | 5.155437                      | 1.381004  | 2.697268  |
| 6                                  | 5.427140                      | -0.981486 | 1.764812  | 6                                     | 4.543325                      | 0.589506  | 1.733953  |
| 6                                  | 4.653197                      | -0.865294 | 0.614743  | 1                                     | 5.982055                      | 1.987858  | -1.052132 |
| 1                                  | 5.790066                      | 2.196981  | -0.435177 | 1                                     | 7.091429                      | 3.348452  | 0.688534  |
| 1                                  | 7.165734                      | 1.948596  | 1.598952  | 1                                     | 6.540070                      | 2.981200  | 3.094491  |
| 1                                  | 6.918017                      | -0.081400 | 3.033018  | 1                                     | 4.907211                      | 1.202556  | 3.738409  |
| 1                                  | 5.321991                      | -1.884803 | 2.357367  | 1                                     | 4.347517                      | 0.494055  | -1.714365 |
| 1                                  | 4.202646                      | 1.369284  | -1.976571 | 8                                     | 3.679744                      | -0.380426 | 2.142307  |
| 8                                  | 3.876454                      | -1.926460 | 0.261793  | 1                                     | 3.378280                      | -0.875724 | 1.363545  |
| 1                                  | 3.446590                      | -1.720460 | -0.588968 | 1                                     | -2.794604                     | 0.516899  | -0.468140 |
| E (S <sub>0</sub> )                | -1031.03501872 E <sub>h</sub> |           |           | E (S <sub>0</sub> )                   | -1031.03413797 E <sub>h</sub> |           |           |
| E (S <sub>1</sub> )                | -1031.03017321 E <sub>h</sub> |           |           | E (S <sub>1</sub> )                   | -1031.02955865 E <sub>h</sub> |           |           |

| CI MK $\leftrightarrow$ MKR2<br>TURBOMOLE |                |                |           | CI DK $\leftrightarrow$ DKR1<br>TURBOMOLE |                |                |           |
|-------------------------------------------|----------------|----------------|-----------|-------------------------------------------|----------------|----------------|-----------|
| 6                                         | -6.507228      | 2.782405       | 1.795878  | 6                                         | 6.777589       | -2.157509      | 1.616635  |
| 6                                         | -5.091733      | 2.474476       | 1.807022  | 6                                         | 5.528528       | -1.422362      | 1.625385  |
| 6                                         | -4.790715      | 1.055033       | 1.661638  | 6                                         | 4.340288       | -2.291092      | 1.669740  |
| 6                                         | -5.778722      | 0.079006       | 1.531207  | 6                                         | 4.433056       | -3.691099      | 1.687767  |
| 6                                         | -7.128944      | 0.443473       | 1.527763  | 6                                         | 5.671574       | -4.327710      | 1.670076  |
| 6                                         | -7.472974      | 1.803888       | 1.663486  | 6                                         | 6.838541       | -3.536078      | 1.637355  |
| 1                                         | -6.770252      | 3.832267       | 1.888362  | 1                                         | 7.679772       | -1.552726      | 1.594487  |
| 1                                         | -5.492877      | -0.967159      | 1.434856  | 1                                         | 3.517639       | -4.280586      | 1.717479  |
| 1                                         | -7.901758      | -0.309214      | 1.411501  | 1                                         | 5.739217       | -5.410820      | 1.682333  |
| 1                                         | -8.524177      | 2.083289       | 1.661632  | 1                                         | 7.809061       | -4.029044      | 1.627085  |
| 8                                         | -4.176828      | 3.328615       | 1.934044  | 8                                         | 5.447617       | -0.172011      | 1.572765  |
| 6                                         | -3.365443      | 0.708588       | 1.699289  | 6                                         | 3.048008       | -1.626029      | 1.727045  |
| 7                                         | -2.649674      | 0.675264       | 0.619262  | 7                                         | 2.419418       | -1.284021      | 0.624031  |
| 1                                         | -2.852664      | 0.463502       | 2.630216  | 1                                         | 2.572206       | -1.359278      | 2.670677  |
| 6                                         | -1.268939      | 0.353330       | 0.425703  | 6                                         | 1.181060       | -0.632628      | 0.435000  |
| 6                                         | -0.740643      | 0.557337       | -0.859680 | 6                                         | 0.756565       | -0.401476      | -0.881545 |
| 6                                         | 0.583201       | 0.254344       | -1.124724 | 6                                         | -0.450393      | 0.229442       | -1.142797 |
| 6                                         | 1.417316       | -0.273004      | -0.100392 | 6                                         | -1.267583      | 0.648259       | -0.076516 |
| 6                                         | 0.865885       | -0.444259      | 1.197005  | 6                                         | -0.834432      | 0.415020       | 1.242653  |
| 6                                         | -0.456377      | -0.151981      | 1.463929  | 6                                         | 0.371845       | -0.215643      | 1.502746  |
| 1                                         | -1.371581      | 0.971816       | -1.642922 | 1                                         | 1.382558       | -0.719053      | -1.711507 |
| 1                                         | 0.991966       | 0.451067       | -2.109781 | 1                                         | -0.745293      | 0.391646       | -2.172400 |
| 1                                         | 1.507944       | -0.832672      | 1.980637  | 1                                         | -1.453861      | 0.735646       | 2.076468  |
| 1                                         | -0.848570      | -0.314219      | 2.462028  | 1                                         | 0.672106       | -0.372769      | 2.532413  |
| 7                                         | 2.757101       | -0.589495      | -0.281779 | 7                                         | -2.495727      | 1.287213       | -0.264414 |
| 6                                         | 3.211407       | -1.011344      | -1.434766 | 6                                         | -3.096369      | 1.604688       | -1.438355 |
| 6                                         | 4.606662       | -1.239823      | -1.671519 | 6                                         | -4.308641      | 2.234993       | -1.598710 |
| 6                                         | 5.022634       | -1.707776      | -2.933650 | 6                                         | -5.162644      | 2.674050       | -0.525664 |
| 6                                         | 6.387806       | -1.951440      | -3.199673 | 6                                         | -6.348916      | 3.291035       | -0.782216 |
| 6                                         | 7.341673       | -1.718241      | -2.176651 | 6                                         | -6.768455      | 3.514626       | -2.143678 |
| 6                                         | 6.968513       | -1.260091      | -0.927394 | 6                                         | -6.009543      | 3.124950       | -3.202681 |
| 6                                         | 5.587443       | -1.011548      | -0.649609 | 6                                         | -4.721452      | 2.455119       | -3.019136 |
| 1                                         | 4.271750       | -1.872234      | -3.701891 | 1                                         | -4.863224      | 2.515011       | 0.509879  |
| 1                                         | 6.703822       | -2.309524      | -4.172820 | 1                                         | -6.987659      | 3.619482       | 0.031741  |
| 1                                         | 8.394635       | -1.900545      | -2.376757 | 1                                         | -7.721228      | 4.010342       | -2.316030 |
| 1                                         | 7.695163       | -1.082332      | -0.142201 | 1                                         | -6.323684      | 3.292639       | -4.228159 |
| 1                                         | 2.526730       | -1.246286      | -2.259520 | 1                                         | -2.576003      | 1.338886       | -2.353121 |
| 8                                         | 5.256921       | -0.583675      | 0.584386  | 8                                         | -4.020389      | 2.094052       | -3.974415 |
| 1                                         | 4.269090       | -0.480254      | 0.598001  | 1                                         | 2.951652       | -1.533350      | -0.208855 |
| 1                                         | -3.177561      | 0.939413       | -0.212116 | 1                                         | -2.982805      | 1.538184       | 0.586440  |
| E (S <sub>0</sub> )                       | -1031.03150361 | E <sub>h</sub> |           | E (S <sub>0</sub> )                       | -1031.00654820 | E <sub>h</sub> |           |
| E (S <sub>1</sub> )                       | -1031.03098295 | E <sub>h</sub> |           | E (S <sub>1</sub> )                       | -1031.00469789 | E <sub>h</sub> |           |

| CI DKR1↔DKR2<br>TURBOMOLE |                               |           |           |
|---------------------------|-------------------------------|-----------|-----------|
| 6                         | -7.438535                     | -0.999500 | 0.019078  |
| 6                         | -6.008867                     | -1.304540 | -0.041893 |
| 6                         | -5.103738                     | -0.114825 | -0.010096 |
| 6                         | -5.652123                     | 1.212198  | 0.072261  |
| 6                         | -6.998015                     | 1.409463  | 0.121783  |
| 6                         | -7.894413                     | 0.281227  | 0.094461  |
| 1                         | -8.115121                     | -1.848132 | 0.000590  |
| 1                         | -4.986622                     | 2.074929  | 0.100960  |
| 1                         | -7.405505                     | 2.413643  | 0.185130  |
| 1                         | -8.965200                     | 0.468406  | 0.136408  |
| 8                         | -5.579287                     | -2.470128 | -0.116694 |
| 6                         | -3.761352                     | -0.393022 | -0.064322 |
| 7                         | -2.766235                     | 0.525744  | -0.079720 |
| 1                         | -3.482141                     | -1.441473 | -0.104553 |
| 6                         | -1.389159                     | 0.293195  | -0.092503 |
| 6                         | -0.528937                     | 1.397017  | -0.244675 |
| 6                         | 0.847796                      | 1.238069  | -0.264683 |
| 6                         | 1.400640                      | -0.045388 | -0.143541 |
| 6                         | 0.550976                      | -1.148539 | 0.014460  |
| 6                         | -0.826977                     | -0.990088 | 0.040260  |
| 1                         | -0.951025                     | 2.391708  | -0.359960 |
| 1                         | 1.478299                      | 2.113357  | -0.374570 |
| 1                         | 0.972736                      | -2.143014 | 0.136884  |
| 1                         | -1.451714                     | -1.864341 | 0.174628  |
| 7                         | 2.793344                      | -0.282202 | -0.160651 |
| 6                         | 3.802233                      | 0.570087  | -0.195368 |
| 6                         | 5.175898                      | 0.135276  | -0.076062 |
| 6                         | 5.987560                      | -0.095201 | -1.199759 |
| 6                         | 7.323592                      | -0.434141 | -1.048292 |
| 6                         | 7.851420                      | -0.576947 | 0.261011  |
| 6                         | 7.070253                      | -0.403992 | 1.378735  |
| 6                         | 5.673896                      | -0.013262 | 1.303482  |
| 1                         | 5.560115                      | -0.015168 | -2.198933 |
| 1                         | 7.962923                      | -0.555927 | -1.916530 |
| 1                         | 8.907325                      | -0.812492 | 0.377616  |
| 1                         | 7.459937                      | -0.569211 | 2.379884  |
| 1                         | 3.544463                      | 1.626517  | -0.191819 |
| 8                         | 4.940636                      | 0.131312  | 2.305778  |
| 1                         | -3.067728                     | 1.500914  | -0.103683 |
| 1                         | 3.068652                      | -1.261527 | -0.115101 |
| E (S <sub>0</sub> )       | -1031.00573372 E <sub>h</sub> |           |           |
| E (S <sub>1</sub> )       | -1031.00325583 E <sub>h</sub> |           |           |



### Maxima on the Proton-Transfer Coordinates:

| Transition State Structure E→MK<br>Optimized GAUSSIAN |                               |           |           | Transition State Structure E*→MK*<br>Optimized TURBOMOLE |                               |           |           |
|-------------------------------------------------------|-------------------------------|-----------|-----------|----------------------------------------------------------|-------------------------------|-----------|-----------|
| 6                                                     | -6.852665                     | -1.166304 | -0.385161 | 6                                                        | 6.842840                      | 1.255550  | -0.055444 |
| 6                                                     | -5.460374                     | -0.865815 | -0.308024 | 6                                                        | 5.469466                      | 0.890201  | -0.080769 |
| 6                                                     | -5.090766                     | 0.427824  | 0.237742  | 6                                                        | 5.096028                      | -0.488879 | -0.330120 |
| 6                                                     | -6.092201                     | 1.333773  | 0.673725  | 6                                                        | 6.108622                      | -1.411784 | -0.538354 |
| 6                                                     | -7.424564                     | 1.006004  | 0.581616  | 6                                                        | 7.471699                      | -1.031595 | -0.509993 |
| 6                                                     | -7.792070                     | -0.255610 | 0.045957  | 6                                                        | 7.830887                      | 0.299384  | -0.268234 |
| 1                                                     | -7.137073                     | -2.130517 | -0.793004 | 1                                                        | 7.081098                      | 2.296861  | 0.134796  |
| 1                                                     | -5.785687                     | 2.295226  | 1.080673  | 1                                                        | 5.850183                      | -2.450936 | -0.727045 |
| 1                                                     | -8.190246                     | 1.699372  | 0.912692  | 1                                                        | 8.237442                      | -1.782539 | -0.677162 |
| 1                                                     | -8.846810                     | -0.509338 | -0.024726 | 1                                                        | 8.877610                      | 0.585834  | -0.246880 |
| 8                                                     | -4.556097                     | -1.701179 | -0.700995 | 8                                                        | 4.544136                      | 1.790613  | 0.119476  |
| 1                                                     | -3.437905                     | -1.067709 | -0.459366 | 1                                                        | 3.566197                      | 1.209867  | 0.042226  |
| 6                                                     | -3.714359                     | 0.743783  | 0.327467  | 6                                                        | 3.684016                      | -0.855633 | -0.350417 |
| 7                                                     | -2.818008                     | -0.130491 | -0.083520 | 7                                                        | 2.793223                      | 0.087848  | -0.142282 |
| 1                                                     | -3.400483                     | 1.700180  | 0.748196  | 1                                                        | 3.411779                      | -1.894537 | -0.533091 |
| 6                                                     | -1.426604                     | 0.034027  | -0.089735 | 6                                                        | 1.422771                      | -0.049758 | -0.115584 |
| 6                                                     | -0.637271                     | -1.116124 | -0.252287 | 6                                                        | 0.652676                      | 1.113266  | 0.135387  |
| 6                                                     | 0.748423                      | -1.029810 | -0.268192 | 6                                                        | -0.724163                     | 1.069420  | 0.189919  |
| 6                                                     | 1.389232                      | 0.213484  | -0.119723 | 6                                                        | -1.423229                     | -0.160894 | -0.003667 |
| 6                                                     | 0.593937                      | 1.366156  | -0.000615 | 6                                                        | -0.640424                     | -1.320594 | -0.271846 |
| 6                                                     | -0.791006                     | 1.282961  | 0.021009  | 6                                                        | 0.734164                      | -1.278714 | -0.324745 |
| 1                                                     | -1.126671                     | -2.078104 | -0.369874 | 1                                                        | 1.173626                      | 2.056125  | 0.282727  |
| 1                                                     | 1.336025                      | -1.927997 | -0.428581 | 1                                                        | -1.271790                     | 1.988350  | 0.367983  |
| 1                                                     | 1.086837                      | 2.329853  | 0.077455  | 1                                                        | -1.168020                     | -2.256893 | -0.428443 |
| 1                                                     | -1.375068                     | 2.194248  | 0.095096  | 1                                                        | 1.284415                      | -2.192243 | -0.527602 |
| 7                                                     | 2.782765                      | 0.381161  | -0.137251 | 7                                                        | -2.783847                     | -0.323435 | 0.036797  |
| 6                                                     | 3.582278                      | -0.536167 | 0.305684  | 6                                                        | -3.624667                     | 0.636970  | 0.392738  |
| 6                                                     | 5.021489                      | -0.404051 | 0.239633  | 6                                                        | -5.041759                     | 0.433615  | 0.380502  |
| 6                                                     | 5.845021                      | -1.430917 | 0.745232  | 6                                                        | -5.922613                     | 1.472252  | 0.772129  |
| 6                                                     | 7.225989                      | -1.336677 | 0.695153  | 6                                                        | -7.296863                     | 1.297848  | 0.768981  |
| 6                                                     | 7.812179                      | -0.192415 | 0.130481  | 6                                                        | -7.838862                     | 0.062880  | 0.369676  |
| 6                                                     | 7.031256                      | 0.838747  | -0.373975 | 6                                                        | -7.007130                     | -0.982649 | -0.020719 |
| 6                                                     | 5.631115                      | 0.751637  | -0.328147 | 6                                                        | -5.614798                     | -0.820543 | -0.023434 |
| 1                                                     | 5.371712                      | -2.309030 | 1.178239  | 1                                                        | -5.493266                     | 2.423635  | 1.079211  |
| 1                                                     | 7.846944                      | -2.135412 | 1.086515  | 1                                                        | -7.951814                     | 2.109118  | 1.072774  |
| 1                                                     | 8.894356                      | -0.108564 | 0.086350  | 1                                                        | -8.916131                     | -0.079943 | 0.365552  |
| 1                                                     | 7.475153                      | 1.726772  | -0.810920 | 1                                                        | -7.408580                     | -1.942422 | -0.330761 |
| 1                                                     | 3.195387                      | -1.453375 | 0.767630  | 1                                                        | -3.272611                     | 1.617321  | 0.727134  |
| 8                                                     | 4.906085                      | 1.764558  | -0.820503 | 8                                                        | -4.841854                     | -1.846368 | -0.403261 |
| 1                                                     | 3.946100                      | 1.525636  | -0.696036 | 1                                                        | -3.890455                     | -1.526598 | -0.328154 |
| E (S <sub>0</sub> )                                   | -1031.74300623 E <sub>h</sub> |           |           | E (S <sub>1</sub> )                                      | -1031.00945537 E <sub>h</sub> |           |           |

| Transition State Structure MK→DK<br>Optimized GAUSSIAN |                               |           |           | Transition State Structure MK*→DK*<br>Optimized TURBOMOLE |                               |           |           |
|--------------------------------------------------------|-------------------------------|-----------|-----------|-----------------------------------------------------------|-------------------------------|-----------|-----------|
| 6                                                      | -6.940209                     | 1.141998  | 0.057194  | 6                                                         | 6.985066                      | 1.142315  | 0.016528  |
| 6                                                      | -5.513887                     | 0.923536  | 0.056068  | 6                                                         | 5.560429                      | 0.919981  | 0.012326  |
| 6                                                      | -5.074479                     | -0.475694 | -0.044050 | 6                                                         | 5.117737                      | -0.468696 | -0.005552 |
| 6                                                      | -6.036875                     | -1.528831 | -0.130761 | 6                                                         | 6.046634                      | -1.493138 | -0.018015 |
| 6                                                      | -7.377826                     | -1.259465 | -0.124382 | 6                                                         | 7.444783                      | -1.233072 | -0.014107 |
| 6                                                      | -7.819492                     | 0.095781  | -0.029086 | 6                                                         | 7.895262                      | 0.084674  | 0.003199  |
| 1                                                      | -7.278813                     | 2.170289  | 0.129745  | 1                                                         | 7.315982                      | 2.175661  | 0.030004  |
| 1                                                      | -5.679296                     | -2.554171 | -0.202636 | 1                                                         | 5.704574                      | -2.525945 | -0.031046 |
| 1                                                      | -8.105585                     | -2.061127 | -0.190571 | 1                                                         | 8.144395                      | -2.061486 | -0.024565 |
| 1                                                      | -8.888110                     | 0.296840  | -0.025261 | 1                                                         | 8.961250                      | 0.292513  | 0.006530  |
| 8                                                      | -4.687354                     | 1.880322  | 0.136966  | 8                                                         | 4.736587                      | 1.885327  | 0.023435  |
| 6                                                      | -3.708812                     | -0.770004 | -0.052370 | 6                                                         | 3.697492                      | -0.789090 | -0.009911 |
| 7                                                      | -2.783958                     | 0.187192  | 0.028650  | 7                                                         | 2.786421                      | 0.139305  | 0.004542  |
| 1                                                      | -3.379162                     | -1.804033 | -0.123828 | 1                                                         | 3.387345                      | -1.830580 | -0.025766 |
| 6                                                      | -1.390477                     | 0.058915  | 0.024626  | 6                                                         | 1.375196                      | 0.033437  | 0.005328  |
| 6                                                      | -0.630359                     | 1.229977  | 0.182957  | 6                                                         | 0.637375                      | 1.225420  | -0.000640 |
| 6                                                      | 0.755990                      | 1.183272  | 0.190845  | 6                                                         | -0.747510                     | 1.203392  | -0.002452 |
| 6                                                      | 1.426666                      | -0.040693 | 0.029324  | 6                                                         | -1.451423                     | -0.033884 | 0.002255  |
| 6                                                      | 0.664196                      | -1.211422 | -0.117125 | 6                                                         | -0.679416                     | -1.231038 | 0.010189  |
| 6                                                      | -0.722781                     | -1.167388 | -0.122985 | 6                                                         | 0.699138                      | -1.204149 | 0.011651  |
| 1                                                      | -1.140480                     | 2.179593  | 0.314127  | 1                                                         | 1.160309                      | 2.179411  | -0.004734 |
| 1                                                      | 1.311375                      | 2.102105  | 0.344977  | 1                                                         | -1.288320                     | 2.142249  | -0.006694 |
| 1                                                      | 1.176264                      | -2.160604 | -0.239825 | 1                                                         | -1.204723                     | -2.181146 | 0.015948  |
| 1                                                      | -1.274924                     | -2.091858 | -0.249519 | 1                                                         | 1.242882                      | -2.144311 | 0.020115  |
| 7                                                      | 2.820530                      | -0.169214 | 0.021766  | 7                                                         | -2.809000                     | -0.151445 | 0.000871  |
| 6                                                      | 3.704492                      | 0.797314  | -0.132748 | 6                                                         | -3.714867                     | 0.857309  | -0.008438 |
| 6                                                      | 5.084989                      | 0.494527  | -0.087153 | 6                                                         | -5.085083                     | 0.536083  | -0.005672 |
| 6                                                      | 6.072840                      | 1.499992  | -0.255247 | 6                                                         | -6.094120                     | 1.539890  | -0.015593 |
| 6                                                      | 7.410262                      | 1.184269  | -0.214848 | 6                                                         | -7.433490                     | 1.207853  | -0.012374 |
| 6                                                      | 7.797867                      | -0.164980 | -0.005125 | 6                                                         | -7.816131                     | -0.154127 | 0.000980  |
| 6                                                      | 6.873013                      | -1.172299 | 0.159333  | 6                                                         | -6.868142                     | -1.165353 | 0.010775  |
| 6                                                      | 5.475328                      | -0.888187 | 0.125634  | 6                                                         | -5.480186                     | -0.870826 | 0.007792  |
| 1                                                      | 5.751193                      | 2.527020  | -0.415199 | 1                                                         | -5.786082                     | 2.584100  | -0.025773 |
| 1                                                      | 8.165363                      | 1.952650  | -0.341328 | 1                                                         | -8.191820                     | 1.985535  | -0.019988 |
| 1                                                      | 8.856914                      | -0.408420 | 0.025725  | 1                                                         | -8.872663                     | -0.411465 | 0.003601  |
| 1                                                      | 7.172881                      | -2.202659 | 0.318432  | 1                                                         | -7.155368                     | -2.212473 | 0.020968  |
| 1                                                      | 3.376825                      | 1.822610  | -0.309730 | 1                                                         | -3.392397                     | 1.896477  | -0.018592 |
| 8                                                      | 4.584325                      | -1.811838 | 0.273514  | 8                                                         | -4.579401                     | -1.810177 | 0.016608  |
| 1                                                      | 3.452626                      | -1.156817 | 0.168532  | 1                                                         | 3.223973                      | 1.092628  | 0.016307  |
| 1                                                      | -3.251520                     | 1.131171  | 0.099008  | 1                                                         | -3.472688                     | -1.151163 | 0.009959  |
| E (S <sub>0</sub> )                                    | -1031.73470056 E <sub>h</sub> |           |           | E (S <sub>1</sub> )                                       | -1031.01012824 E <sub>h</sub> |           |           |

### Maxima on the Way to the Conical Intersections:

| Maximum on Path to CI: E* $\leftrightarrow$ ER*<br>Optimized TURBOMOLE |                               |           |           | Maximum on Path to CI: MK* $\leftrightarrow$ MKR1*<br>Optimized TURBOMOLE |                               |           |           |
|------------------------------------------------------------------------|-------------------------------|-----------|-----------|---------------------------------------------------------------------------|-------------------------------|-----------|-----------|
| 6                                                                      | 6.847183                      | 1.025810  | -1.159018 | 6                                                                         | -6.547266                     | 1.118134  | 2.868515  |
| 6                                                                      | 5.510572                      | 0.867546  | -0.770196 | 6                                                                         | -5.190772                     | 0.864440  | 2.442578  |
| 6                                                                      | 5.022556                      | -0.433868 | -0.380495 | 6                                                                         | -4.909966                     | -0.465915 | 1.909679  |
| 6                                                                      | 5.937467                      | -1.521824 | -0.414545 | 6                                                                         | -5.918892                     | -1.412034 | 1.833208  |
| 6                                                                      | 7.250728                      | -1.348366 | -0.812364 | 6                                                                         | -7.235878                     | -1.121738 | 2.262060  |
| 6                                                                      | 7.706840                      | -0.068728 | -1.187978 | 6                                                                         | -7.533327                     | 0.144410  | 2.775957  |
| 1                                                                      | 7.181534                      | 2.019314  | -1.440834 | 1                                                                         | -6.756086                     | 2.106518  | 3.264319  |
| 1                                                                      | 5.579423                      | -2.505339 | -0.118782 | 1                                                                         | -5.698450                     | -2.400173 | 1.435064  |
| 1                                                                      | 7.930840                      | -2.194837 | -0.830969 | 1                                                                         | -8.004582                     | -1.883030 | 2.188330  |
| 1                                                                      | 8.738521                      | 0.067983  | -1.499945 | 1                                                                         | -8.543797                     | 0.367517  | 3.105479  |
| 8                                                                      | 4.709062                      | 1.938813  | -0.758756 | 8                                                                         | -4.292073                     | 1.751879  | 2.527611  |
| 1                                                                      | 3.814108                      | 1.630124  | -0.420132 | 6                                                                         | -3.572199                     | -0.809692 | 1.458772  |
| 6                                                                      | 3.677118                      | -0.623983 | 0.034276  | 7                                                                         | -2.585884                     | 0.029385  | 1.512301  |
| 7                                                                      | 2.806548                      | 0.391938  | 0.107193  | 1                                                                         | -3.388639                     | -1.805956 | 1.064148  |
| 1                                                                      | 3.375041                      | -1.632960 | 0.330814  | 6                                                                         | -1.225857                     | -0.127507 | 1.120463  |
| 6                                                                      | 1.459783                      | 0.216062  | 0.109910  | 6                                                                         | -0.373771                     | 0.965636  | 1.311797  |
| 6                                                                      | 0.637835                      | 1.317352  | 0.506434  | 6                                                                         | 0.964056                      | 0.888274  | 0.953278  |
| 6                                                                      | -0.730889                     | 1.218126  | 0.550734  | 6                                                                         | 1.500322                      | -0.293450 | 0.363443  |
| 6                                                                      | -1.386876                     | -0.003079 | 0.193785  | 6                                                                         | 0.601589                      | -1.390593 | 0.185959  |
| 6                                                                      | -0.573119                     | -1.089193 | -0.235054 | 6                                                                         | -0.724918                     | -1.315030 | 0.556337  |
| 6                                                                      | 0.798227                      | -0.993054 | -0.284077 | 1                                                                         | -0.763255                     | 1.881463  | 1.752351  |
| 1                                                                      | 1.136492                      | 2.242882  | 0.779106  | 1                                                                         | 1.622707                      | 1.727984  | 1.144960  |
| 1                                                                      | -1.312490                     | 2.083887  | 0.849638  | 1                                                                         | 0.998527                      | -2.299650 | -0.254348 |
| 1                                                                      | -1.071783                     | -2.010192 | -0.524447 | 1                                                                         | -1.365091                     | -2.178860 | 0.398713  |
| 1                                                                      | 1.389337                      | -1.829779 | -0.641510 | 7                                                                         | 2.797066                      | -0.451539 | -0.008286 |
| 7                                                                      | -2.741096                     | -0.212664 | 0.220801  | 6                                                                         | 3.645025                      | 0.598594  | -0.108216 |
| 6                                                                      | -3.619587                     | 0.658201  | 0.684959  | 6                                                                         | 4.992187                      | 0.543060  | 0.313803  |
| 6                                                                      | -5.026040                     | 0.384106  | 0.633061  | 6                                                                         | 5.857032                      | 1.669652  | 0.179253  |
| 6                                                                      | -5.963270                     | 1.317158  | 1.133669  | 6                                                                         | 7.171528                      | 1.630153  | 0.606703  |
| 6                                                                      | -7.324835                     | 1.064706  | 1.092512  | 6                                                                         | 7.687411                      | 0.451845  | 1.177224  |
| 6                                                                      | -7.797662                     | -0.145438 | 0.542226  | 6                                                                         | 6.879188                      | -0.679688 | 1.309698  |
| 6                                                                      | -6.912926                     | -1.089132 | 0.041027  | 6                                                                         | 5.548270                      | -0.658524 | 0.887062  |
| 6                                                                      | -5.527791                     | -0.848055 | 0.074004  | 1                                                                         | 5.451418                      | 2.576574  | -0.264198 |
| 1                                                                      | -5.592148                     | 2.247420  | 1.557110  | 1                                                                         | 7.805166                      | 2.506230  | 0.500212  |
| 1                                                                      | -8.027299                     | 1.794471  | 1.483029  | 1                                                                         | 8.719856                      | 0.416366  | 1.513215  |
| 1                                                                      | -8.865696                     | -0.341757 | 0.510768  | 1                                                                         | 7.261999                      | -1.600393 | 1.739388  |
| 1                                                                      | -7.256633                     | -2.025762 | -0.385773 | 1                                                                         | 3.281350                      | 1.551516  | -0.511499 |
| 1                                                                      | -3.315117                     | 1.607617  | 1.133486  | 8                                                                         | 4.801137                      | -1.769061 | 1.016153  |
| 8                                                                      | -4.701156                     | -1.768995 | -0.413097 | 1                                                                         | 3.895115                      | -1.545127 | 0.641120  |
| 1                                                                      | -3.762799                     | -1.406508 | -0.290571 | 1                                                                         | -2.887785                     | 0.947692  | 1.909145  |
| E (S <sub>1</sub> )                                                    | -1031.01038856 E <sub>h</sub> |           |           | E (S <sub>1</sub> )                                                       | -1031.01147311 E <sub>h</sub> |           |           |

| Maximum on Path to CI: MK↔MKR2<br>Optimized TURBOMOLE |                               |           |           | Maximum on Path to CI: DK↔DKR1<br>Optimized TURBOMOLE |                               |           |           |
|-------------------------------------------------------|-------------------------------|-----------|-----------|-------------------------------------------------------|-------------------------------|-----------|-----------|
| 6                                                     | -6.856957                     | 1.200733  | -0.313568 | 6                                                     | 6.947659                      | 1.075287  | 0.410787  |
| 6                                                     | -5.486904                     | 0.860423  | -0.482509 | 6                                                     | 5.550388                      | 0.807804  | 0.522293  |
| 6                                                     | -5.123368                     | -0.526092 | -0.207709 | 6                                                     | 5.112803                      | -0.529071 | 0.131072  |
| 6                                                     | -6.044059                     | -1.376439 | 0.350288  | 6                                                     | 5.996658                      | -1.394960 | -0.470390 |
| 6                                                     | -7.422516                     | -1.006687 | 0.494486  | 6                                                     | 7.389057                      | -1.087240 | -0.582036 |
| 6                                                     | -7.810671                     | 0.267125  | 0.142472  | 6                                                     | 7.845949                      | 0.133070  | -0.120767 |
| 1                                                     | -7.158325                     | 2.196393  | -0.624830 | 1                                                     | 7.296838                      | 2.031859  | 0.786804  |
| 1                                                     | -5.734010                     | -2.369455 | 0.667257  | 1                                                     | 5.639353                      | -2.348305 | -0.853395 |
| 1                                                     | -8.141400                     | -1.743414 | 0.837598  | 1                                                     | 8.068832                      | -1.823626 | -0.997093 |
| 1                                                     | -8.851409                     | 0.568023  | 0.227147  | 1                                                     | 8.901935                      | 0.380794  | -0.183793 |
| 8                                                     | -4.576144                     | 1.707401  | -0.803384 | 8                                                     | 4.695739                      | 1.682917  | 0.895871  |
| 6                                                     | -3.689737                     | -0.878142 | -0.346204 | 6                                                     | 3.681162                      | -0.843404 | 0.259234  |
| 7                                                     | -2.819321                     | 0.016521  | 0.096529  | 7                                                     | 2.803679                      | 0.101167  | -0.002765 |
| 1                                                     | -3.331409                     | -1.716534 | -0.940392 | 1                                                     | 3.326237                      | -1.824941 | 0.560266  |
| 6                                                     | -1.429741                     | -0.081507 | 0.131034  | 6                                                     | 1.408466                      | 0.022597  | -0.035870 |
| 6                                                     | -0.667003                     | 1.101955  | 0.176282  | 6                                                     | 0.662806                      | 1.204113  | 0.133685  |
| 6                                                     | 0.715386                      | 1.044013  | 0.188121  | 6                                                     | -0.719737                     | 1.173043  | 0.129846  |
| 6                                                     | 1.388752                      | -0.200946 | 0.153903  | 6                                                     | -1.407726                     | -0.052720 | -0.047509 |
| 6                                                     | 0.609807                      | -1.377013 | 0.158409  | 6                                                     | -0.648039                     | -1.231031 | -0.238811 |
| 6                                                     | -0.774298                     | -1.329395 | 0.138414  | 6                                                     | 0.733181                      | -1.200943 | -0.234649 |
| 1                                                     | -1.174897                     | 2.063068  | 0.194602  | 1                                                     | 1.182205                      | 2.146893  | 0.286145  |
| 1                                                     | 1.280264                      | 1.968462  | 0.253152  | 1                                                     | -1.266339                     | 2.099322  | 0.265511  |
| 1                                                     | 1.124550                      | -2.332851 | 0.173157  | 1                                                     | -1.169089                     | -2.169809 | -0.402889 |
| 1                                                     | -1.350978                     | -2.248327 | 0.168544  | 1                                                     | 1.289501                      | -2.114393 | -0.419523 |
| 7                                                     | 2.774046                      | -0.352962 | 0.158273  | 7                                                     | -2.782446                     | -0.163214 | -0.057468 |
| 6                                                     | 3.586735                      | 0.594032  | -0.213454 | 6                                                     | -3.711308                     | 0.800227  | 0.089068  |
| 6                                                     | 5.021436                      | 0.441737  | -0.151115 | 6                                                     | -5.076818                     | 0.492903  | 0.050326  |
| 6                                                     | 5.862624                      | 1.493738  | -0.574587 | 6                                                     | -6.054493                     | 1.521416  | 0.207611  |
| 6                                                     | 7.242809                      | 1.377945  | -0.527660 | 6                                                     | -7.396746                     | 1.237215  | 0.174762  |
| 6                                                     | 7.814398                      | 0.186899  | -0.049795 | 6                                                     | -7.822815                     | -0.108185 | -0.019639 |
| 6                                                     | 7.016741                      | -0.869810 | 0.372973  | 6                                                     | -6.922288                     | -1.134761 | -0.176508 |
| 6                                                     | 5.618053                      | -0.762221 | 0.329834  | 6                                                     | -5.503687                     | -0.900237 | -0.151990 |
| 1                                                     | 5.402700                      | 2.408933  | -0.941629 | 1                                                     | -5.711327                     | 2.544156  | 0.355422  |
| 1                                                     | 7.875020                      | 2.196864  | -0.855984 | 1                                                     | -8.132346                     | 2.026551  | 0.295205  |
| 1                                                     | 8.895747                      | 0.086169  | -0.009509 | 1                                                     | -8.888762                     | -0.324072 | -0.043997 |
| 1                                                     | 7.447522                      | -1.794828 | 0.742561  | 1                                                     | -7.246216                     | -2.160341 | -0.324959 |
| 1                                                     | 3.214475                      | 1.545908  | -0.611104 | 1                                                     | -3.383625                     | 1.825558  | 0.240218  |
| 8                                                     | 4.876610                      | -1.800092 | 0.741216  | 8                                                     | -4.660776                     | -1.844504 | -0.296634 |
| 1                                                     | 3.920230                      | -1.534312 | 0.628240  | 1                                                     | 3.247742                      | 1.046762  | 0.059621  |
| 1                                                     | -3.244759                     | 0.974682  | 0.128941  | 1                                                     | -3.275607                     | -1.097900 | -0.193061 |
| E (S <sub>1</sub> )                                   | -1031.01182586 E <sub>h</sub> |           |           | E (S <sub>1</sub> )                                   | -1031.00437235 E <sub>h</sub> |           |           |

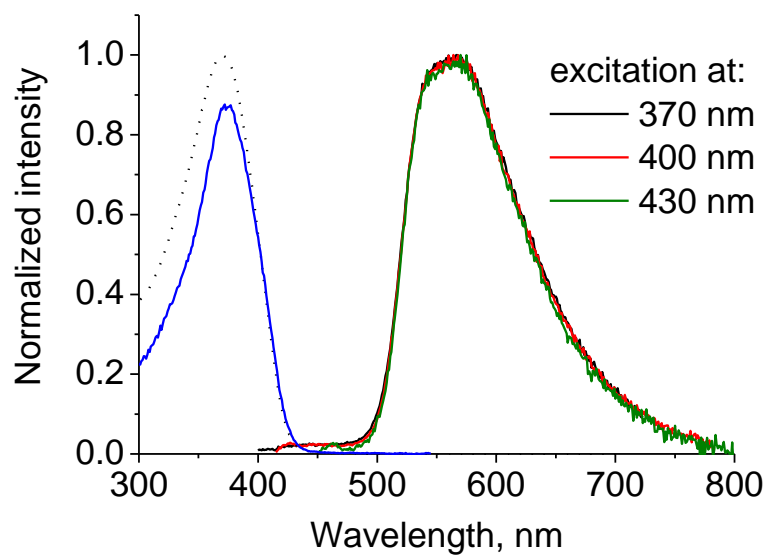

Figure S1. Normalized stationary absorption ( $1-10^{-A}$ , where A is absorbance, dotted line) and emission spectra of BSP in DCM upon excitation at indicated wavelength (solid lines). The solid blue line shows the fluorescence excitation spectrum measured for 560 nm observation wavelength and normalized to the absorption spectrum.

Table S1.

Time constants and their fractional amplitudes (in parentheses, normalized to 100 %) obtained from exponential functions fits to the fs-transients (convoluted with an IRF of 210 fs) at the indicated emission wavelengths of BSP in HEX and upon excitation at 370 nm.

| Wavelength / nm | $\tau_1$ / fs | $\tau_2$ / ps | $\tau_3$ / ps |
|-----------------|---------------|---------------|---------------|
| 455             | 80 (100%)     |               |               |
| 535             | 130 (68%)     |               | 20 (32%)      |
| 550             | 100 (31%)     | 2.8 (14%)     | 23 (55%)      |
| 600             |               | 1.0 (23%)     | 21 (77%)      |
| 650             |               | 2.4 (30%)     | 25 (70%)      |

Table S2.

Time constants and their fractional amplitudes (in parentheses, normalized to 100 %) obtained from exponential functions fits to the fs-transients (convoluted with an IRF of 220 fs) at the indicated emission wavelengths of BSP in DCM and upon excitation at 375 nm.

| Wavelength / nm | $\tau_1$ / fs | $\tau_2$ / ps | $\tau_3$ / ps |
|-----------------|---------------|---------------|---------------|
| 455             | 50 (100%)     |               |               |
| 490             | 50 (88%)      | 1.8 (9%)      | 20 (3%)       |
| 550             | 50 (26%)      | 0.7 (12 %)    | 20 (62%)      |
| 600             | -             | 1.0 (15%)     | 19 (85%)      |
| 650             | -             | 3.1 (23%)     | 20 (77%)      |

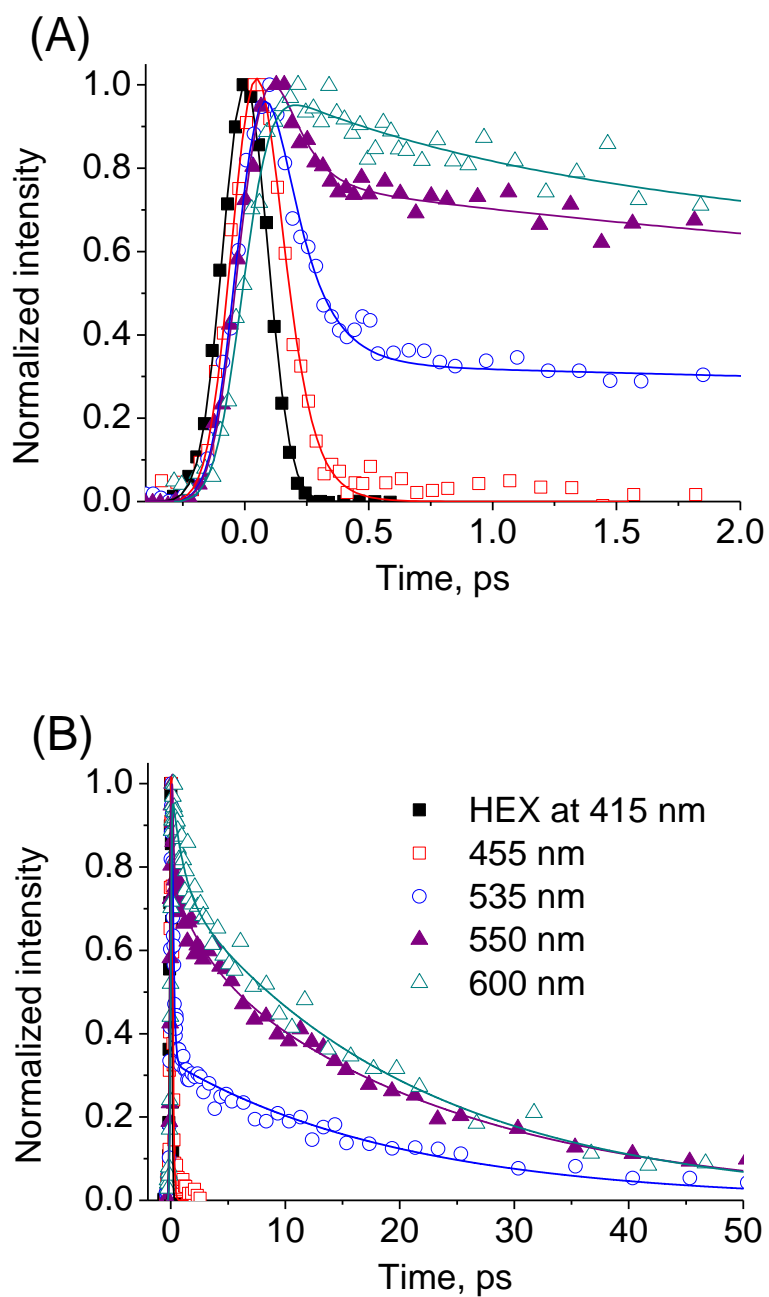

Figure S2. Femtosecond (fs) emission transients of BSP in HEX on shorter (A) and longer (B) time scale at the indicated, representative wavelengths of observation, and upon excitation at 370 nm. The solid lines are from the best fit (see Table S1), and the dotted one is of IRF (FWHM=210 fs) measured at the Raman emission at 415 nm.

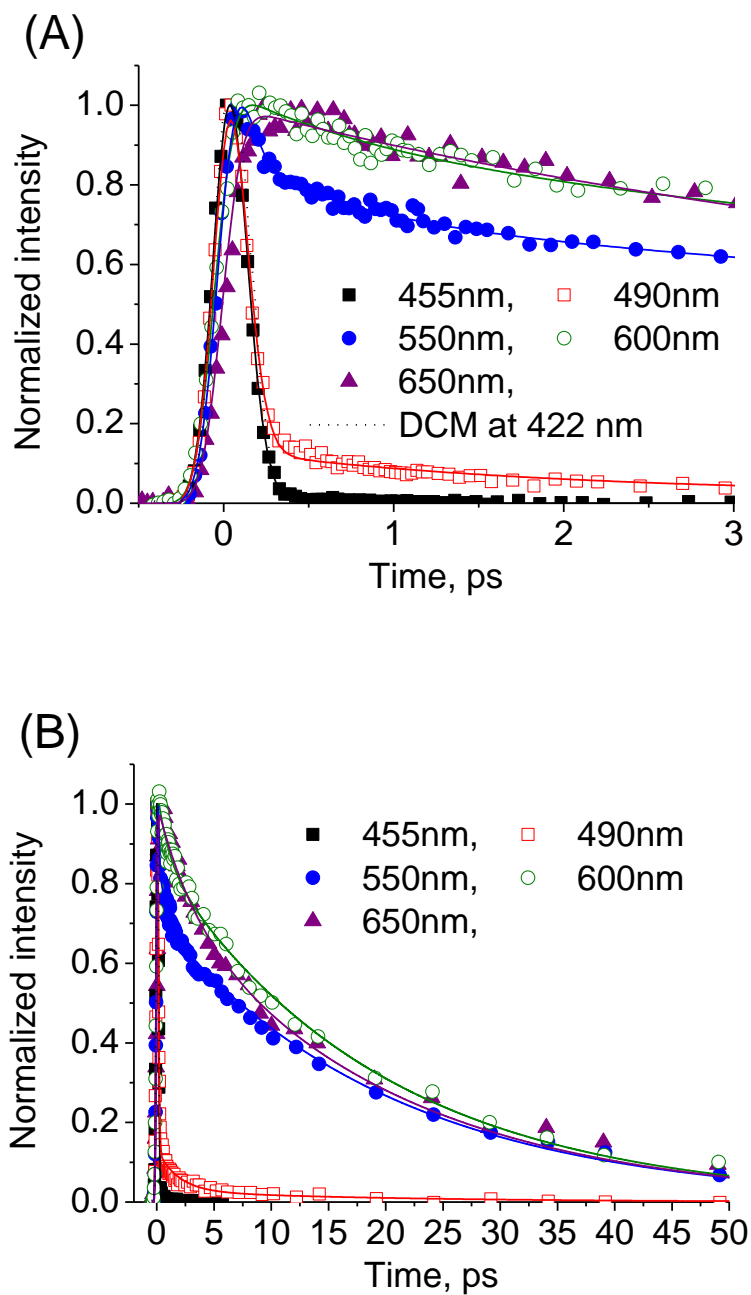

Figure S3. Femtosecond (fs) emission transients of BSP in DCM on shorter (A) and longer (B) time scale at the indicated wavelengths of observation, and upon excitation at 375 nm. The solid lines are from the best fit (see Table 1), and the dotted one is of IRF (FWHM=220 fs) measured at the Raman emission at 422 nm.



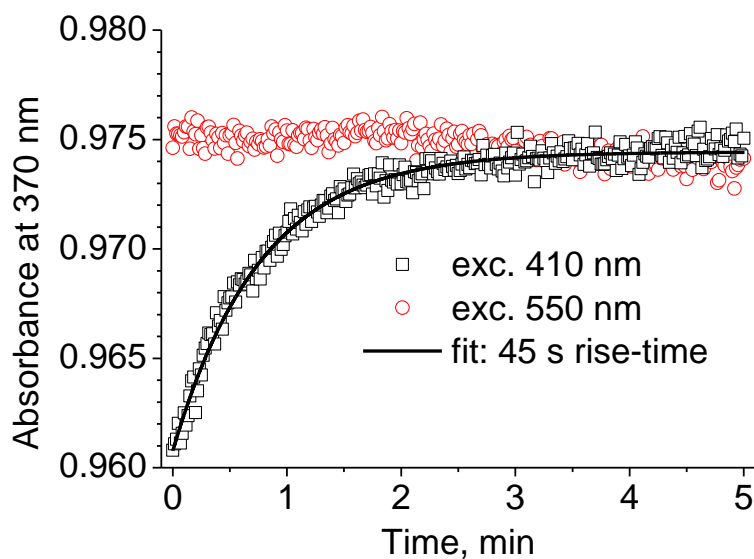

Figure S4. Temporal changes in the absorbance measured at 370 nm at the stationary absorption setup after the irradiation of the BSP/HEX with 410 nm, 3 mJ nanosecond pulses for 4 minutes at 10 Hz (open black squares). The time between the end of the irradiation and the beginning of the kinetics measurements is about 25 s. The solid line shows the fit with 1-exp rise and the characteristic time of 45 s. For the reference, the irradiation experiment with the same conditions was performed, but with the excitation far away from the absorption band of BSP (at 550 nm, open red circles), showing no changes in the absorbance.
